# Supplementary material for: Dynamics and variability in the pleiotropic effects of adaptation in laboratory budding yeast populations
Source: eLife journal article supplement (doi:10.7554/elife.70918), 2021-10-01

# Evolution environment

YPD

YPD + Acetic acid

YPD, 37°C (diploid)

YPD, 37°C (haploid)

YPD

0.05  
0.00

Gen 1000 median = 0.055

0.058

0.028

0.031

YPD + Acetic acid

0.20  
0.10  
0.00

0.160

0.194

0.036

0.024

YPD, 37°C

0.00  
-0.10  
-0.20

0.022

0.026

0.031

0.033

YPD, 21°C

0.10  
0.00  
-0.10

-0.012

-0.038

-0.011

0.050

YPD + NaCl

0.15  
0.10  
0.05  
0.00

0.058

0.068

0.056

0.059

Generation

Fitness in assay environment

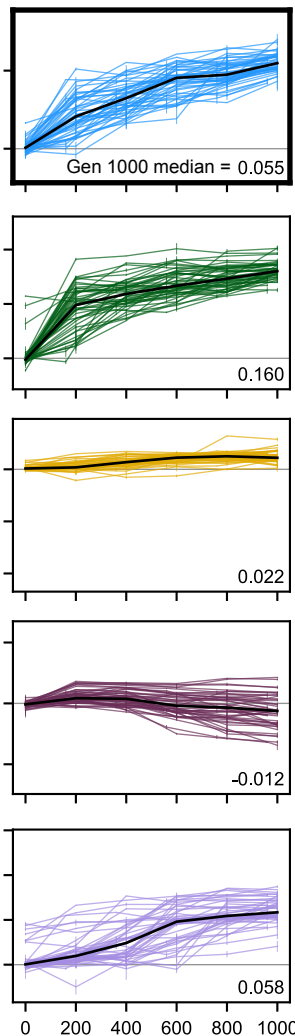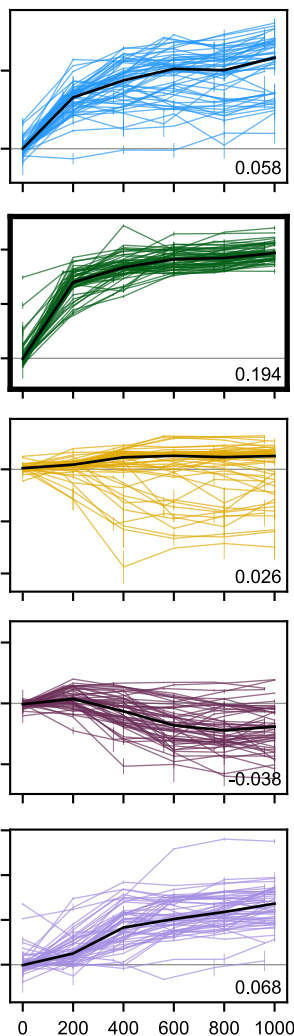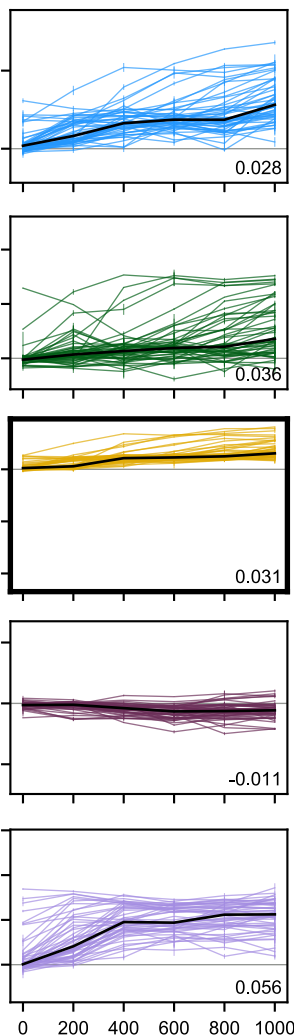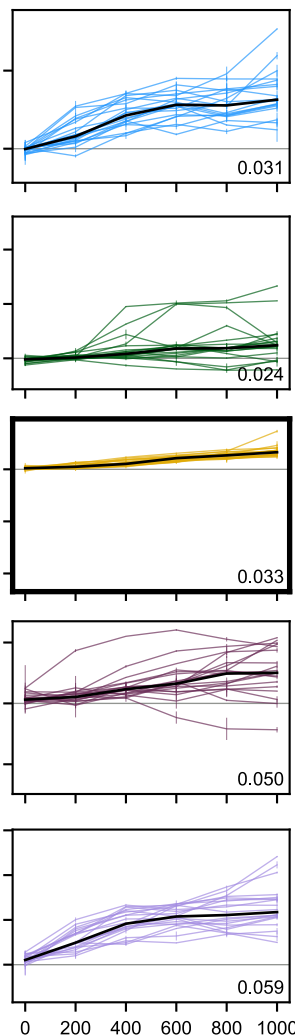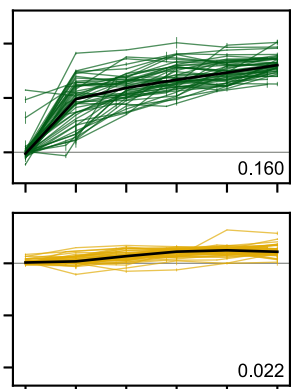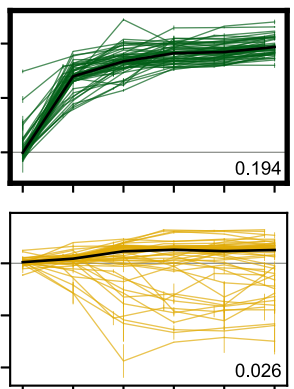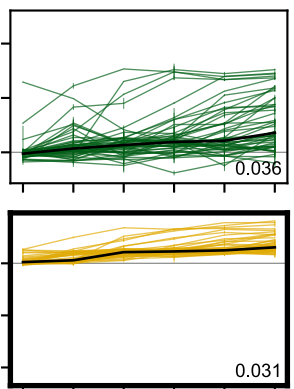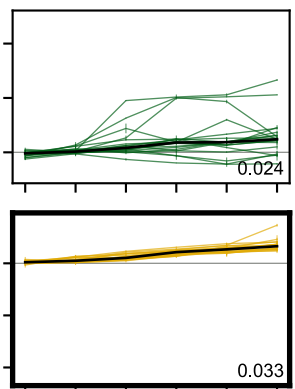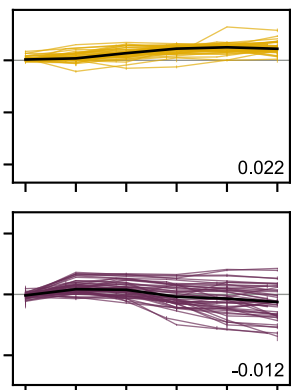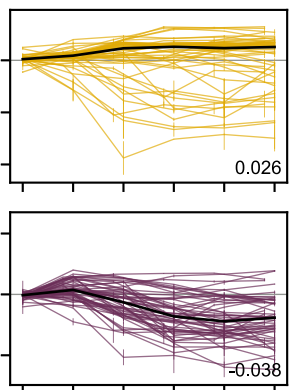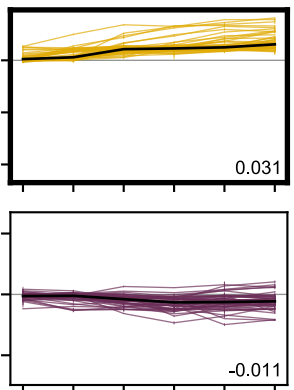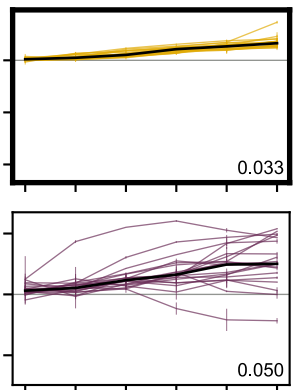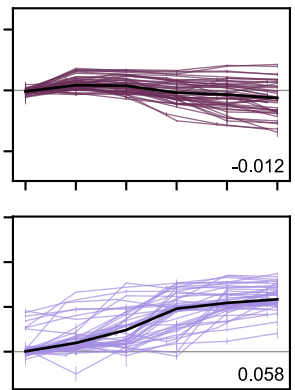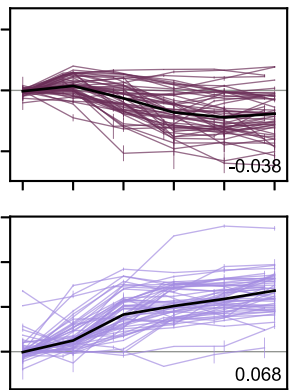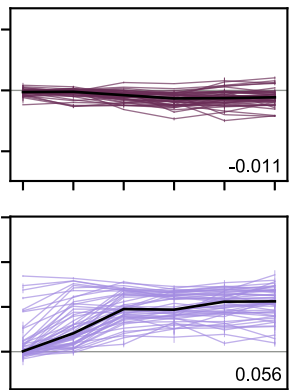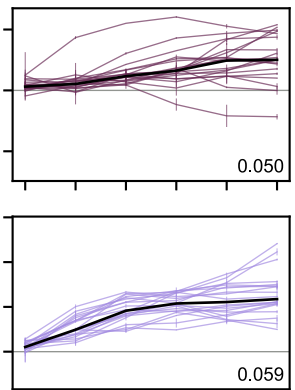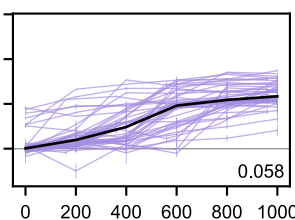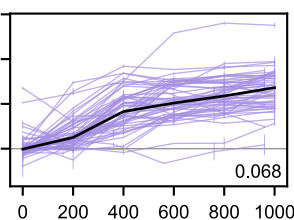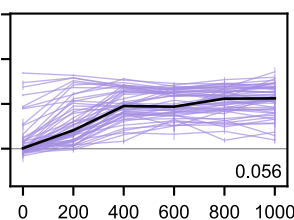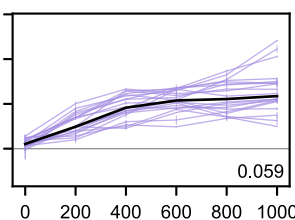

Supplement: supp [file elife-70918-supp-v1.zip]
