# Supplementary material for: Dynamics and variability in the pleiotropic effects of adaptation in laboratory budding yeast populations
Source: eLife. 2021 Oct 1;10:e70918. doi: 10.7554/eLife.70918 (PMC8579951; doi:10.7554/eLife.70918)
Supplement: Figure 1—source data 1. [file elife-70918-fig1-data1.xlsx]

## Sheet: growth_curves
Time	hap_cloneA_37C_rep1	hap_cloneA_37C_rep2	hap_cloneB_37C_rep1	hap_cloneB_37C_rep2	dip_cloneA_37C_rep1	dip_cloneA_37C_rep2	dip_cloneB_37C_rep1	dip_cloneB_37C_rep2	hap_cloneA_RT_rep1	hap_cloneA_RT_rep2	hap_cloneB_RT_rep1	hap_cloneB_RT_rep2	dip_cloneA_RT_rep1	dip_cloneA_RT_rep2	dip_cloneB_RT_rep1	dip_cloneB_RT_rep2	hap_cloneA_YPD_rep1	hap_cloneA_YPD_rep2	hap_cloneA_AA_rep1	hap_cloneA_AA_rep2	hap_cloneA_NaCl_rep1	hap_cloneA_NaCl_rep2	hap_cloneB_YPD_rep1	hap_cloneB_YPD_rep2	hap_cloneB_AA_rep1	hap_cloneB_AA_rep2	hap_cloneB_NaCl_rep1	hap_cloneB_NaCl_rep2	dip_cloneA_YPD_rep1	dip_cloneA_YPD_rep2	dip_cloneA_AA_rep1	dip_cloneA_AA_rep2	dip_cloneA_NaCl_rep1	dip_cloneA_NaCl_rep2	dip_cloneB_YPD_rep1	dip_cloneB_YPD_rep2	dip_cloneB_AA_rep1	dip_cloneB_AA_rep2	dip_cloneB_NaCl_rep1	dip_cloneB_NaCl_rep2
00:02:04	0.7109	0.6504	0.7079	0.7216	0.7	0.6938	0.7174	0.6449	0.673	0.5577	0.6329	0.6848	0.6449	0.776	0.7165	0.5614	0.6449	0.6437	0.7713	0.654	0.685	0.5638	0.703	0.6183	0.6412	0.7508	0.5194	0.6149	0.6377	0.6465	0.7111	0.5032	0.5999	0.6696	0.6176	0.6435	0.693	0.6176	0.6965	0.6787
00:22:04	0.7041	0.6489	0.7037	0.7148	0.6991	0.6905	0.7141	0.6427	0.6721	0.5561	0.6324	0.6839	0.6441	0.774	0.7159	0.5606	0.6477	0.6416	0.7667	0.6511	0.6786	0.5617	0.6993	0.6146	0.6367	0.7467	0.5149	0.6103	0.6317	0.6419	0.703	0.4925	0.5963	0.6655	0.6148	0.6394	0.6914	0.6169	0.6944	0.6784
00:42:04	0.7008	0.6472	0.7012	0.7124	0.6976	0.6883	0.7134	0.6408	0.6716	0.5564	0.6323	0.6834	0.6445	0.774	0.7156	0.5606	0.6476	0.6389	0.7646	0.6504	0.6768	0.5609	0.6987	0.6139	0.6344	0.7452	0.5119	0.6084	0.6295	0.6395	0.7	0.4912	0.5936	0.6625	0.6146	0.6374	0.6905	0.6246	0.6923	0.679
01:02:04	0.6988	0.6458	0.7002	0.7112	0.697	0.6874	0.7136	0.6387	0.6711	0.5556	0.6315	0.6832	0.6436	0.7731	0.7154	0.5598	0.6465	0.638	0.7639	0.6498	0.6762	0.5602	0.6987	0.6132	0.6337	0.744	0.5107	0.608	0.6286	0.6387	0.6998	0.4909	0.5925	0.662	0.6148	0.6368	0.6898	0.6242	0.6911	0.6796
01:22:04	0.698	0.6463	0.6995	0.7107	0.6967	0.6872	0.7136	0.6397	0.6707	0.5556	0.6313	0.6834	0.6431	0.773	0.7151	0.56	0.6465	0.6374	0.7635	0.6498	0.6757	0.5599	0.6994	0.6131	0.6335	0.7431	0.5106	0.6077	0.6279	0.6377	0.6987	0.4904	0.5918	0.6627	0.615	0.6363	0.6893	0.6241	0.6905	0.6794
01:42:04	0.6972	0.6463	0.6998	0.7097	0.6963	0.6866	0.7131	0.6371	0.6705	0.5565	0.6312	0.6837	0.6435	0.7727	0.7151	0.56	0.6463	0.6365	0.7628	0.6493	0.6748	0.559	0.6987	0.6125	0.6319	0.7424	0.5094	0.6072	0.6272	0.6371	0.6996	0.4899	0.5917	0.6614	0.615	0.6356	0.6882	0.6234	0.6902	0.6793
02:02:04	0.6976	0.646	0.7001	0.7094	0.6961	0.6862	0.7125	0.6363	0.67	0.5559	0.6315	0.6831	0.6434	0.7724	0.715	0.5599	0.646	0.6366	0.7624	0.6491	0.6735	0.5589	0.6986	0.6127	0.6317	0.7413	0.5098	0.6068	0.6272	0.637	0.6995	0.49	0.5924	0.6619	0.6147	0.6361	0.6878	0.6223	0.6905	0.6796
02:22:04	0.6968	0.6452	0.6997	0.7088	0.6959	0.6862	0.7134	0.6357	0.67	0.5561	0.6312	0.6838	0.6436	0.7723	0.7147	0.56	0.6459	0.636	0.7625	0.6492	0.6733	0.5584	0.6993	0.6124	0.6316	0.7411	0.5098	0.6068	0.6269	0.6368	0.698	0.4901	0.5918	0.6618	0.6148	0.6358	0.6875	0.6218	0.6903	0.6795
02:42:04	0.6969	0.6458	0.6992	0.7085	0.6957	0.6859	0.713	0.6366	0.6701	0.5564	0.6315	0.6837	0.6438	0.7723	0.7148	0.5603	0.6458	0.6364	0.7623	0.6488	0.6741	0.5585	0.6986	0.612	0.6317	0.7419	0.5092	0.6067	0.627	0.6373	0.6975	0.4897	0.591	0.662	0.6145	0.6351	0.6875	0.6234	0.6892	0.6797
03:02:04	0.6971	0.646	0.6992	0.7093	0.6956	0.6864	0.7124	0.637	0.67	0.5561	0.6314	0.6836	0.6437	0.7727	0.7145	0.5608	0.6456	0.6363	0.7621	0.649	0.6741	0.5588	0.699	0.6132	0.6318	0.7418	0.5095	0.6066	0.6276	0.6373	0.6977	0.4895	0.5917	0.6602	0.6153	0.6355	0.6875	0.6233	0.6891	0.679
03:22:04	0.6967	0.6468	0.699	0.7086	0.6955	0.6864	0.7126	0.6376	0.6699	0.5561	0.631	0.6847	0.6434	0.7722	0.7149	0.5608	0.6457	0.6369	0.7622	0.6487	0.6742	0.5586	0.7004	0.6125	0.6324	0.7415	0.5098	0.6065	0.627	0.6372	0.6971	0.4892	0.5912	0.6603	0.6157	0.6356	0.6873	0.623	0.6888	0.6792
03:42:04	0.6968	0.6472	0.6998	0.7087	0.6954	0.6864	0.7122	0.6375	0.67	0.556	0.6315	0.6847	0.6435	0.7727	0.7147	0.5613	0.6458	0.6373	0.7617	0.6489	0.6737	0.5586	0.6997	0.6131	0.631	0.7414	0.5102	0.6072	0.6279	0.637	0.6988	0.4895	0.5921	0.662	0.6162	0.6361	0.6866	0.6226	0.6896	0.6795
04:02:04	0.6973	0.6488	0.7005	0.708	0.6956	0.6866	0.7121	0.6364	0.6698	0.5563	0.6316	0.6846	0.6438	0.7722	0.7146	0.5617	0.6459	0.6379	0.7618	0.6492	0.6735	0.559	0.7002	0.6138	0.6316	0.741	0.5103	0.6072	0.6285	0.637	0.6982	0.4896	0.593	0.6624	0.6169	0.6368	0.6867	0.622	0.6903	0.6797
04:22:04	0.698	0.65	0.7014	0.7083	0.6973	0.6872	0.7115	0.6374	0.6698	0.5565	0.6319	0.6849	0.6441	0.7724	0.7149	0.5619	0.6464	0.6381	0.7619	0.6492	0.6738	0.559	0.7014	0.6134	0.6317	0.7418	0.5109	0.6077	0.6288	0.638	0.6978	0.4906	0.5929	0.6626	0.6178	0.6369	0.6869	0.6234	0.6902	0.6805
04:42:04	0.6984	0.651	0.7013	0.7087	0.6964	0.6874	0.7119	0.6387	0.6697	0.5569	0.6319	0.6848	0.6439	0.7723	0.7146	0.5623	0.6465	0.6397	0.7621	0.6494	0.6738	0.5594	0.7022	0.6143	0.6318	0.7421	0.5107	0.6075	0.6295	0.6399	0.6974	0.4902	0.5935	0.6627	0.6179	0.6362	0.6844	0.6242	0.6898	0.6793
05:02:04	0.6986	0.652	0.7006	0.7093	0.6962	0.6876	0.7118	0.639	0.6697	0.557	0.6319	0.6854	0.6449	0.7721	0.7149	0.5624	0.6469	0.6406	0.7614	0.6496	0.674	0.5598	0.7016	0.6143	0.6327	0.7421	0.5111	0.608	0.6299	0.6396	0.6977	0.4913	0.5938	0.6622	0.6195	0.6377	0.6848	0.6247	0.6903	0.6793
05:22:04	0.7001	0.6545	0.7024	0.7097	0.6968	0.6892	0.712	0.6415	0.67	0.5575	0.6319	0.6858	0.6451	0.7719	0.715	0.5633	0.6474	0.6412	0.7618	0.6497	0.6744	0.5597	0.703	0.615	0.6325	0.7428	0.5126	0.6085	0.631	0.6404	0.6974	0.4913	0.5943	0.6627	0.621	0.639	0.6848	0.6234	0.6907	0.6806
05:42:04	0.7014	0.6567	0.7029	0.7099	0.6974	0.6902	0.7128	0.6431	0.6697	0.5573	0.6321	0.6858	0.6452	0.7719	0.7149	0.5632	0.6479	0.6432	0.7615	0.6501	0.6748	0.5604	0.7042	0.6162	0.6327	0.7426	0.5123	0.609	0.6311	0.6421	0.6997	0.4921	0.595	0.6632	0.6237	0.6393	0.6849	0.6249	0.6911	0.6802
06:02:04	0.7024	0.6589	0.7045	0.7105	0.6984	0.6923	0.7129	0.6448	0.6698	0.5584	0.6323	0.6866	0.6463	0.7721	0.7152	0.5639	0.6494	0.6439	0.7618	0.6507	0.6748	0.5613	0.7062	0.6173	0.6327	0.7436	0.5144	0.6097	0.6324	0.6435	0.6997	0.4928	0.5967	0.6637	0.6242	0.6406	0.6852	0.6245	0.6922	0.6815
06:22:04	0.7038	0.6623	0.7056	0.712	0.7005	0.6923	0.7131	0.647	0.6704	0.5585	0.6323	0.6862	0.6464	0.7723	0.7158	0.5639	0.6497	0.6466	0.762	0.651	0.6751	0.5623	0.7073	0.6177	0.6341	0.7432	0.5153	0.6102	0.6339	0.6445	0.6995	0.4929	0.5984	0.6655	0.6275	0.6426	0.6857	0.6241	0.693	0.6824
06:42:04	0.7061	0.666	0.7079	0.7129	0.7011	0.6947	0.714	0.6489	0.67	0.5589	0.6329	0.687	0.6476	0.7723	0.7156	0.5651	0.6515	0.6484	0.7621	0.6519	0.6751	0.5622	0.7081	0.6197	0.6348	0.7442	0.516	0.6113	0.6362	0.6466	0.6989	0.4953	0.5985	0.6676	0.629	0.6434	0.6866	0.626	0.6941	0.6828
07:02:04	0.7081	0.6694	0.7096	0.715	0.7032	0.6956	0.7151	0.6504	0.6704	0.5594	0.6329	0.6874	0.6486	0.773	0.7156	0.5664	0.6531	0.6521	0.7624	0.6522	0.6764	0.564	0.71	0.6216	0.6359	0.7451	0.5173	0.6122	0.6393	0.6496	0.6995	0.4952	0.5991	0.666	0.6325	0.6467	0.6869	0.6266	0.6951	0.6826
07:22:04	0.7109	0.6751	0.7119	0.7173	0.7051	0.6983	0.7163	0.6535	0.6703	0.5592	0.6337	0.6884	0.6488	0.7724	0.7158	0.5669	0.6548	0.6546	0.7627	0.6538	0.6772	0.5645	0.7135	0.624	0.6357	0.7463	0.5202	0.6131	0.6403	0.652	0.7022	0.4974	0.6025	0.6675	0.6385	0.6488	0.6876	0.6264	0.6966	0.6851
07:42:04	0.714	0.6795	0.7155	0.72	0.7075	0.7012	0.7186	0.6572	0.6708	0.5604	0.6334	0.6879	0.6504	0.7726	0.7163	0.5688	0.6561	0.6566	0.7631	0.6548	0.6769	0.5661	0.716	0.6262	0.6361	0.7465	0.5215	0.6147	0.6439	0.6549	0.7026	0.4985	0.6051	0.6706	0.6416	0.6528	0.6879	0.6266	0.6977	0.6857
08:02:04	0.7181	0.6848	0.7177	0.7219	0.7109	0.7045	0.7215	0.6626	0.6711	0.5607	0.634	0.6894	0.6508	0.7725	0.7174	0.5699	0.6597	0.662	0.7634	0.656	0.6781	0.5678	0.7192	0.6294	0.638	0.7478	0.5232	0.6169	0.6463	0.6588	0.7042	0.5007	0.6085	0.6723	0.6463	0.6571	0.6889	0.6288	0.6989	0.6866
08:22:04	0.7225	0.693	0.7223	0.7262	0.7143	0.7086	0.724	0.6677	0.6709	0.5612	0.6344	0.6899	0.6532	0.7727	0.7179	0.5714	0.6639	0.667	0.7642	0.6568	0.6791	0.57	0.7221	0.6322	0.6403	0.749	0.5267	0.6182	0.6535	0.6639	0.7056	0.5041	0.6112	0.6757	0.6523	0.6606	0.6907	0.6297	0.7021	0.689
08:42:04	0.7295	0.7015	0.7269	0.7303	0.7196	0.7147	0.7277	0.674	0.6711	0.5616	0.6343	0.69	0.6531	0.7733	0.7175	0.5722	0.668	0.6715	0.7646	0.6588	0.6806	0.5712	0.727	0.6357	0.6425	0.7517	0.5308	0.6198	0.6566	0.6693	0.7065	0.5059	0.613	0.6753	0.6607	0.6661	0.6915	0.632	0.7051	0.6899
09:02:04	0.7357	0.7118	0.7324	0.7361	0.7249	0.721	0.7324	0.6811	0.6716	0.563	0.6354	0.6912	0.6559	0.7736	0.7185	0.5749	0.672	0.6786	0.7657	0.6608	0.6813	0.5751	0.7321	0.6415	0.6441	0.7532	0.5343	0.6225	0.6638	0.6764	0.7088	0.5096	0.618	0.6804	0.6693	0.6733	0.6935	0.6331	0.7063	0.6925
09:22:04	0.7445	0.723	0.7395	0.7419	0.7323	0.7289	0.7381	0.6898	0.6719	0.5632	0.6356	0.6911	0.6561	0.7741	0.7189	0.5762	0.6782	0.6859	0.7669	0.6626	0.6837	0.5766	0.7381	0.647	0.6464	0.7558	0.5364	0.6253	0.6708	0.6835	0.7106	0.5121	0.6221	0.6841	0.6783	0.6803	0.6955	0.6364	0.7107	0.6951
09:42:04	0.7535	0.7355	0.7486	0.7502	0.7415	0.737	0.7463	0.7009	0.6724	0.5646	0.6368	0.6917	0.6595	0.7743	0.7208	0.5793	0.6837	0.694	0.7684	0.6657	0.6848	0.5805	0.7453	0.6525	0.6489	0.7575	0.5411	0.6284	0.6785	0.6945	0.7138	0.5171	0.6275	0.6869	0.6895	0.6916	0.6977	0.6376	0.7134	0.6986
10:02:04	0.7649	0.7481	0.7592	0.7601	0.7519	0.7482	0.7561	0.7131	0.6733	0.5649	0.6369	0.6928	0.6613	0.7748	0.7218	0.5801	0.6917	0.704	0.7698	0.6684	0.6874	0.5844	0.752	0.661	0.6522	0.7607	0.5479	0.6337	0.6887	0.7064	0.718	0.5221	0.6331	0.6907	0.7019	0.7025	0.7004	0.6402	0.7196	0.7018
10:22:04	0.778	0.7663	0.7699	0.7711	0.7637	0.762	0.7677	0.7293	0.6732	0.566	0.6381	0.6932	0.6652	0.7753	0.722	0.5823	0.7007	0.7152	0.7714	0.6722	0.6912	0.5879	0.7605	0.6687	0.6557	0.7649	0.5538	0.6372	0.7019	0.7186	0.7211	0.5287	0.6405	0.6977	0.7183	0.7145	0.7041	0.6441	0.725	0.7056
10:42:04	0.7937	0.7847	0.7845	0.785	0.7786	0.7759	0.7817	0.7469	0.6737	0.5668	0.6382	0.6944	0.6676	0.7758	0.7245	0.5851	0.7111	0.7283	0.774	0.6757	0.6947	0.5924	0.7707	0.6805	0.6604	0.7683	0.56	0.6422	0.7159	0.7333	0.7252	0.5355	0.6479	0.7026	0.7331	0.7289	0.7083	0.6491	0.7308	0.7105
11:02:04	0.8103	0.8065	0.7988	0.8018	0.797	0.7953	0.7998	0.7661	0.6745	0.568	0.6394	0.6951	0.671	0.7769	0.7248	0.5875	0.7241	0.7427	0.7768	0.6809	0.6976	0.5984	0.7808	0.6935	0.6653	0.7714	0.567	0.6484	0.7337	0.7538	0.73	0.5408	0.6586	0.7084	0.756	0.7479	0.7133	0.6523	0.7382	0.716
11:22:04	0.8325	0.8326	0.8194	0.8219	0.8172	0.8165	0.8214	0.7898	0.6756	0.5691	0.6402	0.6964	0.6734	0.7783	0.7266	0.5916	0.7383	0.7573	0.7799	0.686	0.7023	0.6039	0.7978	0.7076	0.6715	0.7781	0.5775	0.653	0.755	0.7751	0.7365	0.5491	0.6686	0.7161	0.7783	0.7699	0.7172	0.6579	0.7444	0.7229
11:42:04	0.8563	0.8576	0.8424	0.844	0.843	0.8419	0.8457	0.8177	0.6756	0.5705	0.641	0.6978	0.6768	0.7789	0.7288	0.5958	0.7541	0.7761	0.7829	0.6915	0.7072	0.6125	0.8125	0.7221	0.6774	0.7851	0.5889	0.6611	0.7781	0.7977	0.7428	0.5589	0.6795	0.7259	0.8038	0.7936	0.724	0.6635	0.7544	0.7306
12:02:04	0.8862	0.8907	0.8679	0.8718	0.871	0.872	0.8733	0.8455	0.6772	0.5716	0.6424	0.6983	0.682	0.78	0.731	0.6002	0.7733	0.7966	0.787	0.6995	0.7129	0.6188	0.8301	0.7433	0.6844	0.7904	0.5991	0.6696	0.8056	0.8282	0.7505	0.5693	0.6925	0.7359	0.8319	0.8245	0.7315	0.6708	0.7646	0.7393
12:22:04	0.915	0.924	0.8971	0.8996	0.9034	0.9022	0.91	0.8842	0.6776	0.5736	0.6434	0.6998	0.6876	0.7807	0.7333	0.6039	0.7966	0.8194	0.7931	0.7064	0.7191	0.6287	0.8523	0.7658	0.693	0.7973	0.6108	0.6782	0.8365	0.8605	0.7599	0.5825	0.7104	0.7496	0.8642	0.8574	0.7407	0.6793	0.7787	0.7473
12:42:04	0.9514	0.9601	0.9293	0.9341	0.9401	0.9398	0.9471	0.9224	0.6786	0.5763	0.6452	0.7009	0.6914	0.7841	0.7359	0.6091	0.8229	0.8454	0.7998	0.7165	0.7264	0.6406	0.8761	0.7903	0.7031	0.8063	0.6245	0.6867	0.8734	0.8985	0.7691	0.5976	0.727	0.7636	0.9041	0.8945	0.749	0.6886	0.792	0.76
13:02:04	0.9934	1.0036	0.9663	0.9739	0.9822	0.9829	0.9897	0.9651	0.6796	0.5767	0.6461	0.7027	0.6966	0.7853	0.738	0.6146	0.8478	0.8748	0.8059	0.7267	0.7362	0.6511	0.9021	0.8158	0.7154	0.8164	0.6413	0.6995	0.915	0.9367	0.7813	0.6129	0.7433	0.7767	0.9422	0.9364	0.76	0.6995	0.8063	0.7709
13:22:04	1.0374	1.049	1.0126	1.0207	1.0303	1.0262	1.0353	1.0149	0.6808	0.5786	0.647	0.7043	0.7014	0.7879	0.7423	0.6188	0.8801	0.9069	0.8138	0.7391	0.7473	0.6651	0.9302	0.848	0.7266	0.8268	0.6618	0.7126	0.9568	0.9835	0.7949	0.628	0.766	0.793	0.989	0.9813	0.7734	0.7111	0.8243	0.7858
13:42:04	1.0864	1.0999	1.059	1.0677	1.079	1.0783	1.0867	1.0643	0.6815	0.5822	0.6499	0.7068	0.7118	0.7907	0.7452	0.6284	0.9148	0.9387	0.8234	0.7511	0.7583	0.6802	0.9656	0.8822	0.7363	0.8391	0.68	0.7262	1.0064	1.0307	0.811	0.6467	0.788	0.8121	1.0363	1.029	0.7861	0.7257	0.8453	0.8029
14:02:04	1.1373	1.154	1.1065	1.119	1.1312	1.1266	1.1428	1.118	0.6837	0.5846	0.6508	0.709	0.7151	0.7946	0.7507	0.6351	0.9535	0.9749	0.836	0.7672	0.7725	0.6977	0.9991	0.9216	0.7558	0.8517	0.7021	0.744	1.0582	1.0843	0.8262	0.6668	0.8134	0.8333	1.0898	1.0818	0.8025	0.7437	0.8673	0.821
14:22:04	1.1938	1.2074	1.1644	1.1732	1.1856	1.1845	1.1936	1.172	0.6855	0.5877	0.6528	0.7114	0.7264	0.7978	0.7553	0.6443	0.9911	1.0169	0.8476	0.7829	0.7866	0.7161	1.0413	0.963	0.7721	0.8644	0.7232	0.762	1.1114	1.1367	0.8443	0.6878	0.84	0.8549	1.1425	1.1372	0.8204	0.759	0.8896	0.8425
14:42:04	1.2549	1.2645	1.2217	1.2317	1.2425	1.2375	1.2512	1.2265	0.6868	0.5883	0.6545	0.7132	0.7352	0.8037	0.7597	0.6516	1.0396	1.0607	0.861	0.801	0.8061	0.7375	1.0824	1.0067	0.7908	0.8804	0.7483	0.7808	1.1675	1.1937	0.8642	0.7118	0.8691	0.8815	1.2003	1.191	0.842	0.7802	0.916	0.8636
15:02:04	1.3125	1.3237	1.2826	1.2914	1.2962	1.2881	1.3044	1.2823	0.6896	0.593	0.6567	0.7166	0.7432	0.8076	0.7668	0.6647	1.0864	1.1057	0.8758	0.8205	0.8232	0.7601	1.1296	1.0549	0.8114	0.9018	0.7755	0.8015	1.2237	1.2485	0.8865	0.7382	0.9009	0.9068	1.2526	1.2473	0.8633	0.8021	0.9437	0.8908
15:22:04	1.3721	1.387	1.3436	1.3514	1.3496	1.3441	1.3573	1.3316	0.6918	0.5952	0.6603	0.7176	0.7569	0.8143	0.773	0.6736	1.1368	1.1567	0.8944	0.8417	0.8471	0.7859	1.1759	1.1064	0.8333	0.9193	0.8035	0.8255	1.2783	1.302	0.9097	0.7666	0.9333	0.9373	1.3077	1.3047	0.8871	0.8254	0.9747	0.915
15:42:04	1.4303	1.4454	1.4022	1.411	1.3979	1.392	1.4031	1.3809	0.6932	0.5985	0.6626	0.7211	0.7677	0.8215	0.7821	0.688	1.1869	1.2066	0.915	0.866	0.8723	0.8156	1.2284	1.1561	0.8585	0.9407	0.835	0.8529	1.3346	1.3501	0.9375	0.7945	0.9684	0.9672	1.3649	1.3591	0.9135	0.8506	1.0071	0.9456
16:02:04	1.4812	1.4975	1.4606	1.4678	1.4391	1.4305	1.4418	1.4255	0.6964	0.603	0.666	0.7241	0.7779	0.8312	0.7907	0.6982	1.2408	1.2564	0.9386	0.8943	0.8978	0.8424	1.2763	1.2089	0.8844	0.964	0.8679	0.8826	1.3841	1.3983	0.9622	0.8247	1.003	1.0013	1.4179	1.413	0.9411	0.8782	1.0389	0.9756
16:22:04	1.5137	1.5305	1.4992	1.5063	1.4674	1.4606	1.4681	1.4465	0.7	0.6067	0.6697	0.7279	0.7932	0.837	0.8001	0.7155	1.2893	1.3107	0.9626	0.922	0.9298	0.8784	1.3307	1.2639	0.9131	0.9918	0.901	0.9122	1.4374	1.438	0.9941	0.8586	1.0397	1.0357	1.4579	1.4551	0.9733	0.9086	1.0747	1.0097
16:42:04	1.525	1.5447	1.5079	1.5161	1.4822	1.4754	1.4739	1.4549	0.7026	0.6109	0.673	0.7319	0.8099	0.8506	0.8122	0.7299	1.3469	1.3621	0.9896	0.9522	0.9617	0.9127	1.3847	1.3196	0.9458	1.0164	0.9387	0.9475	1.4696	1.4629	1.0258	0.8921	1.0754	1.073	1.4957	1.4992	1.0052	0.9404	1.1129	1.043
17:02:04	1.5273	1.5411	1.5087	1.5176	1.4779	1.4692	1.4716	1.4505	0.7065	0.6174	0.6765	0.7365	0.8287	0.8612	0.8258	0.7483	1.4002	1.4167	1.0166	0.9849	0.9958	0.9497	1.4406	1.3766	0.9764	1.046	0.9774	0.9795	1.4958	1.4922	1.0573	0.928	1.116	1.1087	1.5237	1.5122	1.0362	0.9748	1.1472	1.0775
17:22:04	1.5275	1.5424	1.5088	1.5161	1.4754	1.4658	1.4712	1.4508	0.7105	0.6228	0.6807	0.7418	0.8467	0.8766	0.8396	0.7692	1.453	1.4646	1.0482	1.0203	1.0326	0.991	1.4915	1.4277	1.0094	1.077	1.0169	1.0187	1.4991	1.4894	1.0918	0.9671	1.1556	1.1488	1.5161	1.5131	1.0721	1.0111	1.1882	1.1189
17:42:04	1.5281	1.5418	1.5096	1.5179	1.4754	1.4656	1.4706	1.4479	0.7134	0.6288	0.6861	0.7445	0.8656	0.8912	0.8562	0.7875	1.4745	1.4903	1.0839	1.0575	1.0717	1.0318	1.5192	1.4559	1.0466	1.1117	1.0587	1.0599	1.4957	1.4852	1.1255	1.0034	1.1963	1.1841	1.5159	1.5065	1.1085	1.0466	1.2208	1.1533
18:02:04	1.5297	1.5433	1.509	1.5178	1.4736	1.4644	1.4685	1.4473	0.7198	0.6358	0.6916	0.7501	0.8882	0.9105	0.8719	0.8096	1.4615	1.4927	1.116	1.0906	1.1112	1.0732	1.5215	1.4576	1.083	1.1474	1.098	1.1007	1.4967	1.4848	1.1615	1.0393	1.2349	1.2203	1.5128	1.5129	1.143	1.0815	1.2592	1.1933
18:22:04	1.5275	1.5407	1.5075	1.5199	1.4757	1.4683	1.4678	1.4494	0.7248	0.6429	0.698	0.7549	0.9105	0.932	0.8922	0.8367	1.4741	1.4962	1.1527	1.1316	1.1561	1.1141	1.5283	1.4604	1.1226	1.1821	1.1405	1.1385	1.4983	1.495	1.1978	1.0773	1.2721	1.2592	1.5159	1.5135	1.1779	1.116	1.2976	1.2285
18:42:04	1.5274	1.5403	1.507	1.5179	1.4726	1.4655	1.4669	1.4485	0.7306	0.6507	0.7019	0.761	0.9365	0.9537	0.9147	0.8611	1.5082	1.5289	1.2155	1.1981	1.2179	1.1805	1.5539	1.4862	1.1916	1.247	1.2071	1.2047	1.5396	1.5317	1.2651	1.1473	1.3443	1.3299	1.5512	1.5431	1.2504	1.1896	1.3666	1.2983
19:02:04	1.5266	1.5402	1.5074	1.5188	1.4749	1.4658	1.4685	1.4488	0.7364	0.6588	0.7089	0.769	0.9647	0.9778	0.9365	0.8897	1.4804	1.4965	1.2254	1.2103	1.2374	1.2029	1.5276	1.4592	1.2046	1.2585	1.2264	1.2237	1.499	1.5	1.2674	1.155	1.3444	1.3286	1.5137	1.5093	1.2497	1.1937	1.3693	1.3
19:22:04	1.5254	1.54	1.5056	1.5182	1.4751	1.4649	1.4649	1.4469	0.7431	0.6667	0.716	0.7748	0.9906	1.003	0.9656	0.9186	1.4789	1.4979	1.2673	1.25	1.278	1.2425	1.5265	1.4583	1.2454	1.2954	1.2679	1.2644	1.4949	1.4954	1.3032	1.1908	1.3787	1.3636	1.5129	1.5076	1.286	1.2301	1.4012	1.337
19:42:04	1.5252	1.5423	1.5061	1.5173	1.4756	1.4669	1.4658	1.4471	0.7503	0.6779	0.7235	0.7827	1.0247	1.0334	0.9907	0.9498	1.479	1.5005	1.3047	1.2913	1.3176	1.2859	1.5278	1.4587	1.2846	1.3353	1.3099	1.3043	1.5007	1.5048	1.3333	1.2244	1.4144	1.3943	1.5166	1.5127	1.3159	1.2628	1.4343	1.3723
20:02:04	1.5267	1.5427	1.5054	1.5201	1.4748	1.464	1.4628	1.4453	0.7593	0.687	0.7328	0.7923	1.0586	1.0646	1.0248	0.9861	1.4793	1.5005	1.3408	1.3306	1.3587	1.3266	1.5284	1.4596	1.3218	1.3722	1.3487	1.3424	1.503	1.506	1.3569	1.2549	1.4463	1.4278	1.5153	1.5169	1.3467	1.2914	1.4654	1.4059
20:22:04	1.5236	1.539	1.504	1.5158	1.471	1.4657	1.462	1.4458	0.7685	0.6997	0.7415	0.8007	1.0965	1.0995	1.057	1.0214	1.4815	1.5014	1.3728	1.3502	1.3953	1.3662	1.5286	1.4597	1.3487	1.3996	1.3857	1.3847	1.4963	1.5021	1.3719	1.2858	1.4767	1.4575	1.517	1.507	1.3508	1.3153	1.4953	1.4377
20:42:04	1.5214	1.539	1.5017	1.5157	1.4709	1.4626	1.461	1.4415	0.777	0.7103	0.7483	0.8084	1.1314	1.1335	1.0905	1.0579	1.4795	1.4995	1.3881	1.3592	1.4244	1.3956	1.5287	1.4592	1.3576	1.4085	1.4162	1.4145	1.5008	1.51	1.4004	1.2999	1.4934	1.4813	1.5167	1.5135	1.3656	1.3213	1.5156	1.4693
21:02:04	1.5242	1.5391	1.5032	1.5159	1.4711	1.4631	1.461	1.4432	0.7863	0.7219	0.7592	0.8185	1.1684	1.1676	1.1242	1.0947	1.4812	1.501	1.3844	1.354	1.4367	1.412	1.5292	1.462	1.3528	1.4068	1.4383	1.4354	1.502	1.5056	1.4011	1.3108	1.5115	1.4925	1.5166	1.5166	1.3628	1.3267	1.5344	1.4993
21:22:04	1.525	1.5378	1.5008	1.518	1.4695	1.4613	1.4587	1.4418	0.7976	0.7336	0.7717	0.8286	1.2012	1.2009	1.1585	1.1329	1.4821	1.5025	1.3852	1.3537	1.4447	1.4197	1.5305	1.4642	1.3488	1.4062	1.4473	1.446	1.5011	1.5019	1.3887	1.3096	1.5027	1.4985	1.5151	1.5093	1.3539	1.3224	1.5358	1.5255
21:42:04	1.5251	1.5402	1.5006	1.5168	1.4684	1.4627	1.4592	1.4403	0.8109	0.7505	0.7821	0.8414	1.2411	1.2376	1.1928	1.1692	1.4854	1.5023	1.3819	1.3541	1.4434	1.4178	1.5315	1.4623	1.3484	1.4049	1.4471	1.4484	1.4978	1.5039	1.3827	1.3002	1.5032	1.502	1.5154	1.5101	1.3557	1.3167	1.5307	1.5381
22:02:04	1.5232	1.5376	1.4981	1.5156	1.4689	1.459	1.456	1.4397	0.8215	0.7655	0.7942	0.8537	1.2781	1.2702	1.2285	1.2088	1.4848	1.502	1.3843	1.3541	1.4431	1.4186	1.5307	1.4657	1.3478	1.4041	1.4478	1.4466	1.4982	1.5025	1.3794	1.2986	1.5046	1.5007	1.5133	1.5115	1.3517	1.3146	1.5352	1.542
22:22:04	1.5242	1.5381	1.4978	1.5164	1.4677	1.4587	1.4568	1.4385	0.8357	0.7815	0.8069	0.8655	1.3093	1.3047	1.2645	1.2443	1.4778	1.5004	1.3812	1.3522	1.4437	1.4159	1.5326	1.464	1.3471	1.4042	1.4484	1.446	1.505	1.5086	1.3882	1.3043	1.5104	1.4998	1.5176	1.5146	1.3589	1.3146	1.5382	1.5402
22:42:04	1.5218	1.5402	1.4989	1.5181	1.4678	1.4601	1.4551	1.4384	0.8504	0.7967	0.8221	0.8797	1.3502	1.3445	1.2977	1.2854	1.4831	1.5005	1.377	1.353	1.4454	1.414	1.5323	1.4655	1.3478	1.4033	1.4451	1.4478	1.5023	1.5095	1.3907	1.3014	1.5086	1.4996	1.516	1.5141	1.3515	1.3119	1.5417	1.5411
23:02:04	1.5214	1.5387	1.4974	1.516	1.4661	1.4589	1.4518	1.4365	0.8665	0.8158	0.8357	0.8949	1.3839	1.3814	1.3368	1.3194	1.4832	1.4988	1.3813	1.3523	1.4468	1.4168	1.5329	1.467	1.3493	1.402	1.4468	1.446	1.5023	1.5134	1.3876	1.2963	1.5111	1.4978	1.5176	1.515	1.3518	1.3114	1.5401	1.5388
23:22:04	1.5219	1.5356	1.4965	1.5161	1.4664	1.4576	1.4503	1.4347	0.8811	0.833	0.8544	0.9123	1.411	1.4082	1.365	1.3482	1.488	1.5045	1.381	1.3516	1.4445	1.4156	1.5356	1.4689	1.3495	1.4006	1.4475	1.4438	1.5069	1.5079	1.3862	1.2967	1.5088	1.5003	1.5177	1.5151	1.354	1.3128	1.5418	1.5377
23:42:04	1.5216	1.5351	1.4964	1.5176	1.4645	1.4559	1.4481	1.4359	0.9011	0.8537	0.8689	0.9257	1.4443	1.4359	1.3967	1.3907	1.486	1.504	1.3819	1.3506	1.4445	1.4155	1.5381	1.4695	1.347	1.4026	1.4451	1.4449	1.5025	1.5123	1.3872	1.2949	1.5107	1.4986	1.516	1.5169	1.3494	1.3108	1.5443	1.5381
1 day, 0:02:04	1.5208	1.5349	1.4943	1.5176	1.4633	1.4569	1.448	1.431	0.9198	0.8752	0.8875	0.9441	1.4684	1.4622	1.4265	1.4194
1 day, 0:22:04									0.9392	0.8943	0.9055	0.9635	1.4812	1.4761	1.4483	1.431
1 day, 0:42:04									0.9586	0.9162	0.9255	0.9846	1.4744	1.4824	1.454	1.4287
1 day, 1:02:04									0.976	0.941	0.9431	1.0037	1.4708	1.4818	1.4566	1.4283
1 day, 1:22:04									0.9991	0.964	0.9666	1.0255	1.4747	1.4805	1.458	1.435
1 day, 1:42:04									1.0228	0.9874	0.9878	1.0479	1.4771	1.4867	1.4638	1.4334
1 day, 2:02:04									1.046	1.0124	1.0081	1.0666	1.4723	1.4839	1.4558	1.4263
1 day, 2:22:04									1.0691	1.0393	1.0307	1.0915	1.4745	1.4859	1.4572	1.4274
1 day, 2:42:04									1.0973	1.0655	1.0556	1.1152	1.4751	1.4823	1.455	1.4322
1 day, 3:02:04									1.1239	1.0932	1.0811	1.1417	1.474	1.4826	1.4574	1.4262
1 day, 3:22:04									1.1466	1.1194	1.1092	1.168	1.4721	1.4841	1.4574	1.4238
1 day, 3:42:04									1.173	1.1464	1.1325	1.1934	1.4757	1.4852	1.4541	1.431
1 day, 4:02:04									1.2021	1.1745	1.1627	1.218	1.4777	1.4828	1.4578	1.4297
1 day, 4:22:04									1.229	1.2041	1.1891	1.2462	1.4779	1.485	1.4563	1.4289
1 day, 4:42:04									1.2585	1.2375	1.2161	1.2739	1.4844	1.4895	1.46	1.4386
1 day, 5:02:04									1.2845	1.2628	1.246	1.3032	1.4815	1.4842	1.4572	1.4323
1 day, 5:22:04									1.3141	1.2902	1.2721	1.332	1.4827	1.4874	1.4582	1.4338
1 day, 5:42:04									1.3362	1.3054	1.2975	1.3557	1.4827	1.4872	1.4569	1.4317
1 day, 6:02:04									1.3496	1.3065	1.3203	1.3653	1.4843	1.4884	1.4583	1.4374
1 day, 6:22:04									1.3478	1.304	1.3334	1.3675	1.4857	1.4883	1.4577	1.4347
1 day, 6:42:04									1.3476	1.3036	1.3366	1.3639	1.4892	1.4893	1.4584	1.4411
1 day, 7:02:04									1.3468	1.3022	1.334	1.3629	1.4859	1.4912	1.4587	1.4343
1 day, 7:22:04									1.3449	1.2985	1.3285	1.3583	1.488	1.4897	1.4579	1.4377
1 day, 7:42:04									1.3395	1.297	1.326	1.3548	1.4885	1.4887	1.4561	1.4394
1 day, 8:02:04									1.342	1.2956	1.3232	1.3543	1.4932	1.4935	1.4598	1.4414
1 day, 8:22:04									1.3394	1.2915	1.3206	1.353	1.489	1.4927	1.4592	1.4438
1 day, 8:42:04									1.3382	1.293	1.3198	1.3512	1.4912	1.4927	1.4588	1.4441
1 day, 9:02:04									1.3352	1.2923	1.3171	1.3477	1.4872	1.4897	1.4586	1.4425
1 day, 9:22:04									1.3355	1.2884	1.3144	1.347	1.4925	1.4936	1.4597	1.4462
1 day, 9:42:04									1.3339	1.2861	1.313	1.3479	1.493	1.4943	1.4632	1.4503
1 day, 10:02:04									1.3344	1.2867	1.3117	1.3457	1.4916	1.4948	1.4617	1.4482
1 day, 10:22:04									1.3309	1.2869	1.3086	1.3453	1.4907	1.496	1.46	1.4485
1 day, 10:42:04									1.3299	1.2862	1.3071	1.3445	1.4903	1.4972	1.4606	1.4503
1 day, 11:02:04									1.329	1.285	1.3064	1.3436	1.4926	1.4974	1.4624	1.4483
1 day, 11:22:04									1.3285	1.2799	1.3059	1.3416	1.4972	1.4955	1.4598	1.4555
1 day, 11:42:04									1.3286	1.2813	1.3024	1.3409	1.4961	1.496	1.4584	1.4524
1 day, 12:02:04									1.3279	1.2821	1.3035	1.3393	1.4956	1.4985	1.4575	1.4518
1 day, 12:22:04									1.3255	1.2809	1.303	1.3384	1.5007	1.4965	1.4586	1.4532
1 day, 12:42:04									1.3293	1.2818	1.3011	1.3398	1.4979	1.4992	1.459	1.4552
1 day, 13:02:04									1.3237	1.2813	1.3002	1.3383	1.4972	1.4991	1.4597	1.4562
1 day, 13:22:04									1.3255	1.2804	1.2991	1.3371	1.4998	1.4982	1.4596	1.4553
1 day, 13:42:04									1.3246	1.2754	1.2958	1.3346	1.5004	1.4965	1.4582	1.4569
1 day, 14:02:04									1.3252	1.2761	1.2961	1.3362	1.5027	1.496	1.4566	1.4592
1 day, 14:22:04									1.3255	1.2735	1.295	1.3341	1.5034	1.4955	1.4563	1.4624
1 day, 14:42:04									1.3222	1.2734	1.2946	1.337	1.5025	1.4973	1.4572	1.4595
1 day, 15:02:04									1.3228	1.2734	1.2913	1.3341	1.5038	1.497	1.4569	1.4611
1 day, 15:22:04									1.3218	1.2739	1.2903	1.3329	1.5047	1.4972	1.456	1.4606
1 day, 15:42:04									1.3207	1.271	1.2871	1.3319	1.5044	1.496	1.4548	1.4614
1 day, 16:02:04									1.3188	1.27	1.2912	1.3305	1.5061	1.4934	1.4529	1.4636
1 day, 16:22:04									1.318	1.2715	1.2857	1.3315	1.5077	1.4956	1.4522	1.4648
1 day, 16:42:04									1.3193	1.268	1.2801	1.3331	1.507	1.4973	1.4513	1.4651
1 day, 17:02:04									1.3202	1.2709	1.2778	1.3311	1.5086	1.4971	1.4515	1.4655
1 day, 17:22:04									1.3178	1.2693	1.2746	1.3302	1.5098	1.4986	1.4491	1.4694
1 day, 17:42:04									1.3172	1.27	1.2722	1.3314	1.5123	1.4974	1.4481	1.469
1 day, 18:02:04									1.3183	1.2691	1.2722	1.331	1.5135	1.4984	1.4477	1.4687
1 day, 18:22:04									1.3161	1.2645	1.2635	1.3299	1.5151	1.4964	1.445	1.4693
1 day, 18:42:04									1.3134	1.2587	1.2649	1.3253	1.5154	1.4951	1.445	1.471
1 day, 19:02:04									1.3159	1.2579	1.2667	1.3285	1.5157	1.4952	1.4446	1.4731
1 day, 19:22:04									1.3158	1.2597	1.2669	1.3315	1.5171	1.4947	1.4425	1.4747
1 day, 19:42:04									1.3161	1.262	1.2693	1.3284	1.5162	1.4962	1.4412	1.475
1 day, 20:02:04									1.3112	1.2516	1.2727	1.3263	1.5177	1.4925	1.4387	1.4755
1 day, 20:22:04									1.3087	1.2516	1.2797	1.3265	1.5169	1.4935	1.4369	1.4766
1 day, 20:42:04									1.3068	1.253	1.2735	1.3242	1.5169	1.4931	1.435	1.4775
1 day, 21:02:04									1.3031	1.2505	1.275	1.3216	1.5155	1.4871	1.4304	1.4766
1 day, 21:22:04									1.3036	1.2587	1.2689	1.3195	1.5145	1.4867	1.428	1.4782
1 day, 21:42:04									1.3117	1.2577	1.2659	1.3206	1.5139	1.4848	1.4303	1.4784
1 day, 22:02:04									1.2977	1.257	1.2641	1.3155	1.5154	1.4842	1.4283	1.4812
1 day, 22:22:04									1.292	1.2592	1.2659	1.3123	1.5162	1.4861	1.4274	1.4831
1 day, 22:42:04									1.3536	1.2988	1.2949	1.3645	1.5747	1.5496	1.4995	1.5422
1 day, 23:02:04									1.308	1.2544	1.2629	1.3127	1.5155	1.4839	1.4262	1.4845
1 day, 23:22:04									1.307	1.2566	1.2614	1.3126	1.5165	1.4819	1.427	1.4859
1 day, 23:42:04									1.3003	1.2555	1.2569	1.3117	1.5165	1.48	1.4249	1.4843
2 days, 0:02:04									1.3037	1.2521	1.2558	1.3096	1.5155	1.4755	1.4238	1.4833

## Sheet: final_timepoint_counts
sample	counts	cells/mL
hap_cloneA_37C_rep1	71	142000000
hap_cloneA_37C_rep2	75	150000000
hap_cloneB_37C_rep1	65	1.3e+08
hap_cloneB_37C_rep2	71	142000000
dip_cloneA_37C_rep1	64	1.28e+08
dip_cloneA_37C_rep2	62	1.24e+08
dip_cloneB_37C_rep1	63	1.26e+08
dip_cloneB_37C_rep2	72	144000000
hap_cloneA_RT_rep1	24	4.8e+07
hap_cloneA_RT_rep2	32	64000000
hap_cloneB_RT_rep1	32	64000000
hap_cloneB_RT_rep2	43	86000000
dip_cloneA_RT_rep1	84	168000000
dip_cloneA_RT_rep2	94	188000000
dip_cloneB_RT_rep1	89	178000000
dip_cloneB_RT_rep2	65	130000000
hap_cloneA_YPD_rep1	71	142000000
hap_cloneA_YPD_rep2	40	80000000
hap_cloneA_AA_rep1	58	1.16e+08
hap_cloneA_AA_rep2	35	70000000
hap_cloneA_NaCl_rep1	44	88000000
hap_cloneA_NaCl_rep2	74	148000000
hap_cloneB_YPD_rep1	67	134000000
hap_cloneB_YPD_rep2	62	124000000
hap_cloneB_AA_rep1	60	120000000
hap_cloneB_AA_rep2	46	9.2e+07
hap_cloneB_NaCl_rep1	42	84000000
hap_cloneB_NaCl_rep2	32	64000000
dip_cloneA_YPD_rep1	89	178000000
dip_cloneA_YPD_rep2	77	154000000
dip_cloneA_AA_rep1	58	1.16e+08
dip_cloneA_AA_rep2	48	9.6e+07
dip_cloneA_NaCl_rep1	60	120000000
dip_cloneA_NaCl_rep2	66	132000000
dip_cloneB_YPD_rep1	72	144000000
dip_cloneB_YPD_rep2	62	124000000
dip_cloneB_AA_rep1	68	136000000
dip_cloneB_AA_rep2	54	108000000
dip_cloneB_NaCl_rep1	78	156000000
dip_cloneB_NaCl_rep2	71	142000000

## Sheet: population_bottleneck
	environment
ancestral clone	YPD	37˚C	AA	21˚C	NaCl
haploid clone A	8750	13800	10000	5000	11300
haploid clone B	11800	14100	7250	7250	9250
diploid clone A	15000	11800	10300	12500	13000
diploid clone B	15500	13200	7750	12000	11000
