# Supplementary material for: Dynamics and variability in the pleiotropic effects of adaptation in laboratory budding yeast populations
Source: eLife. 2021 Oct 1;10:e70918. doi: 10.7554/eLife.70918 (PMC8579951; doi:10.7554/eLife.70918)
Supplement: Figure 5—source data 1. [file elife-70918-fig5-data1.xlsx]

## Sheet: ExcludingOutliers
p values from one-sided t-test. Format is evolution environment - ploidy - generation.
assay_env	YPD-D-0	YPD-D-200	YPD-D-400	YPD-D-600	YPD-D-800	YPD-D-1000	YPD+AA-D-0	YPD+AA-D-200	YPD+AA-D-400	YPD+AA-D-600	YPD+AA-D-800	YPD+AA-D-1000	YPD(37C)-D-0	YPD(37C)-D-200	YPD(37C)-D-400	YPD(37C)-D-600	YPD(37C)-D-800	YPD(37C)-D-1000	YPD(37C)-H-0	YPD(37C)-H-200	YPD(37C)-H-400	YPD(37C)-H-600	YPD(37C)-H-800	YPD(37C)-H-1000
30C							0.999868	0.999618	0.980988	0.606613	0.455274	0.12222	0.890728	0.628376	0.528028	0.698658	0.567458	0.773449	0.932486	0.0116042	0.0207529	0.0522513	0.00941828	0.133695
AA	0.00027614	1.05016e-07	3.89078e-06	3.2056e-06	8.34391e-07	2.14133e-05							0.0126964	0.00154002	0.00219283	0.00265122	0.000671583	5.89263e-05	0.068428	0.349706	0.0258837	0.00854176	0.0042958	0.0201648
37C	0.104652	0.988277	0.710567	0.909418	0.615539	0.0198618	0.987069	0.95373	0.0244245	0.00116863	0.000599652	0.000299386
21C	0.0499315	0.70414	0.00826592	0.000495261	4.72369e-07	2.1908e-08	0.996697	0.905206	0.0379126	1.6842e-06	2.64014e-06	1.2019e-06	0.252409	0.96302	0.574366	0.497898	0.607588	0.866777	0.00295032	0.0462118	0.0368283	0.00433624	0.000296906	0.000608289
NaCl	0.015439	0.533124	9.40579e-05	0.000360284	0.00688485	0.000207677	0.687677	0.982606	0.387883	0.207558	0.203729	0.0282472	0.00571096	0.000117724	0.000258402	0.0197423	0.125925	0.213923	0.0181082	0.000439292	0.000398027	0.00247081	6.66424e-06	0.00635273
t values (from initial 2-sided test) used to arrive at the one-sided p values
assay_env	YPD-D-0	YPD-D-200	YPD-D-400	YPD-D-600	YPD-D-800	YPD-D-1000	YPD+AA-D-0	YPD+AA-D-200	YPD+AA-D-400	YPD+AA-D-600	YPD+AA-D-800	YPD+AA-D-1000	YPD(37C)-D-0	YPD(37C)-D-200	YPD(37C)-D-400	YPD(37C)-D-600	YPD(37C)-D-800	YPD(37C)-D-1000	YPD(37C)-H-0	YPD(37C)-H-200	YPD(37C)-H-400	YPD(37C)-H-600	YPD(37C)-H-800	YPD(37C)-H-1000
30C							3.94706	3.59977	2.13476	0.272052	-0.112954	-1.17873	1.24957	0.329775	0.0707453	0.524602	0.170975	0.757466	1.56099	-2.46894	-2.18636	-1.70494	-2.56772	-1.14262
AA	-3.73935	-6.19229	-5.09636	-5.15576	-5.56585	-4.56717							-2.32007	-3.14584	-3.01587	-2.94492	-3.4417	-4.25627	-1.55328	-0.392012	-2.07543	-2.61355	-2.93005	-2.20063
37C	-1.27504	2.35183	0.559392	1.35975	0.295694	-2.12262	2.30121	1.71712	-2.02238	-3.21847	-3.44853	-3.6805
21C	-1.68265	0.540483	-2.49699	-3.54102	-5.73819	-6.66557	2.84225	1.33107	-1.81553	-5.26906	-5.13729	-5.36752	-0.672849	1.83373	0.188687	-0.00530002	0.274834	1.12664	-3.09958	-1.77205	-1.89325	-2.92579	-4.1116	-3.79754
NaCl	-2.2338	0.0836247	-4.09479	-3.64959	-2.5711	-3.83456	0.492519	2.17383	-0.286486	-0.822197	-0.835868	-1.95541	-2.64865	-4.03075	-3.76921	-2.12699	-1.16226	-0.800832	-2.25375	-3.94008	-3.98326	-3.17897	-5.81493	-2.75107

## Sheet: IncludingOutliers
p values from one-sided t-test. Format is evolution environment - ploidy - generation.
assay_env	YPD-D-0	YPD-D-200	YPD-D-400	YPD-D-600	YPD-D-800	YPD-D-1000	YPD+AA-D-0	YPD+AA-D-200	YPD+AA-D-400	YPD+AA-D-600	YPD+AA-D-800	YPD+AA-D-1000	YPD(37C)-D-0	YPD(37C)-D-200	YPD(37C)-D-400	YPD(37C)-D-600	YPD(37C)-D-800	YPD(37C)-D-1000	YPD(37C)-H-0	YPD(37C)-H-200	YPD(37C)-H-400	YPD(37C)-H-600	YPD(37C)-H-800	YPD(37C)-H-1000
30C							0.99639	0.999915	0.9873	0.74609	0.606634	0.158473	0.619312	0.69159	0.547804	0.660515	0.543786	0.660458	0.932486	0.0116042	0.0207529	0.0522513	0.00941828	0.133695
AA	0.0142889	6.52767e-08	1.41783e-06	6.95083e-07	2.54069e-07	4.39409e-06							0.116551	0.00192112	0.00111314	0.000712286	2.01115e-05	3.81178e-07	0.068428	0.349706	0.0258837	0.00854176	0.0042958	0.0201648
37C	0.193827	0.996293	0.831269	0.829933	0.511787	0.0173175	0.990209	0.981215	0.0250742	0.00118309	0.000448105	0.000125336
21C	0.211659	0.771886	0.0175055	2.42964e-05	3.84099e-08	4.57351e-09	0.995238	0.964511	0.0357434	1.93349e-05	2.76181e-06	1.26038e-06	0.81619	0.955329	0.447075	0.414368	0.581953	0.841784	0.00295032	0.0462118	0.0368283	0.00433624	0.000296906	0.000608289
NaCl	0.00906104	0.423827	6.95561e-05	0.000202423	0.00176025	2.48908e-05	0.913626	0.95912	0.249245	0.115396	0.155832	0.0228811	0.00382973	1.22525e-05	0.000118762	0.00673179	0.13319	0.185844	0.0181082	0.000439292	0.000398027	0.00247081	6.66424e-06	0.00635273
t values (from initial 2-sided test) used to arrive at the one-sided p values
assay_env	YPD-D-0	YPD-D-200	YPD-D-400	YPD-D-600	YPD-D-800	YPD-D-1000	YPD+AA-D-0	YPD+AA-D-200	YPD+AA-D-400	YPD+AA-D-600	YPD+AA-D-800	YPD+AA-D-1000	YPD(37C)-D-0	YPD(37C)-D-200	YPD(37C)-D-400	YPD(37C)-D-600	YPD(37C)-D-800	YPD(37C)-D-1000	YPD(37C)-H-0	YPD(37C)-H-200	YPD(37C)-H-400	YPD(37C)-H-600	YPD(37C)-H-800	YPD(37C)-H-1000
30C							2.79456	4.047	2.30026	0.666756	0.27193	-1.01029	0.305372	0.50357	0.120738	0.416353	0.110546	0.416196	1.56099	-2.46894	-2.18636	-1.70494	-2.56772	-1.14262
AA	-2.25878	-6.20741	-5.31935	-5.52666	-5.81735	-4.98706							-1.20732	-3.03514	-3.22792	-3.3813	-4.51247	-5.66591	-1.55328	-0.392012	-2.07543	-2.61355	-2.93005	-2.20063
37C	-0.871977	2.79891	0.969089	0.963688	0.0297071	-2.17576	2.40739	2.13304	-2.0044	-3.19354	-3.5198	-3.92628
21C	-0.807724	0.751282	-2.17104	-4.4737	-6.35918	-6.96778	2.69041	1.84264	-1.83922	-4.49104	-5.05225	-5.27312	0.909345	1.73325	-0.133746	-0.217481	0.207997	1.01216	-3.09958	-1.77205	-1.89325	-2.92579	-4.1116	-3.79754
NaCl	-2.44872	-0.193175	-4.14861	-3.80834	-3.07308	-4.46632	1.38207	1.77429	-0.681551	-1.21225	-1.02149	-2.04571	-2.78149	-4.66063	-3.96638	-2.56404	-1.12426	-0.901585	-2.25375	-3.94008	-3.98326	-3.17897	-5.81493	-2.75107
