# Supplementary material for: Dynamics and variability in the pleiotropic effects of adaptation in laboratory budding yeast populations
Source: eLife journal article supplement (doi:10.7554/elife.70918), 2021-10-01
Supplement: supp [file elife-70918-supp-v1.zip]

# Summary of population changes in fitness over 800 generations

| Evolution environment and ploidy |          |             |          |                   |             |          |                     |             |          |                     |             |          |
|----------------------------------|----------|-------------|----------|-------------------|-------------|----------|---------------------|-------------|----------|---------------------|-------------|----------|
| Assay environment                | YPD      |             |          | YPD + Acetic acid |             |          | YPD, 37°C (diploid) |             |          | YPD, 37°C (haploid) |             |          |
|                                  | less fit | equally fit | more fit | less fit          | equally fit | more fit | less fit            | equally fit | more fit | less fit            | equally fit | more fit |
| YPD                              | 0.0%     | 0.0%        | 100.0%   | 0.0%              | 4.2%        | 95.8%    | 0.0%                | 28.6%       | 71.4%    | 0.0%                | 0.0%        | 100.0%   |
| YPD + Acetic Acid                | 0.0%     | 0.0%        | 100.0%   | 0.0%              | 0.0%        | 100.0%   | 2.4%                | 45.2%       | 52.4%    | 5.0%                | 25.0%       | 70.0%    |
| YPD, 37°C                        | 0.0%     | 9.3%        | 90.7%    | 20.8%             | 18.8%       | 60.4%    | 0.0%                | 9.5%        | 90.5%    | 0.0%                | 15.0%       | 85.0%    |
| YPD, 21°C                        | 30.2%    | 46.5%       | 23.3%    | 64.6%             | 27.1%       | 8.3%     | 45.2%               | 45.2%       | 9.5%     | 0.0%                | 30.0%       | 70.0%    |
| YPD + NaCl                       | 0.0%     | 0.0%        | 100.0%   | 0.0%              | 4.2%        | 95.8%    | 0.0%                | 0.0%        | 100.0%   | 0.0%                | 0.0%        | 100.0%   |
