# Supplementary material for: Dynamics and variability in the pleiotropic effects of adaptation in laboratory budding yeast populations
Source: eLife journal article supplement (doi:10.7554/elife.70918), 2021-10-01
Supplement: supp [file elife-70918-supp-v1.zip]

# Summary of population changes in fitness over 600 generations

| Evolution environment and ploidy |          |             |          |                   |             |          |                     |             |          |                     |             |          |
|----------------------------------|----------|-------------|----------|-------------------|-------------|----------|---------------------|-------------|----------|---------------------|-------------|----------|
| Assay environment                | YPD      |             |          | YPD + Acetic acid |             |          | YPD, 37°C (diploid) |             |          | YPD, 37°C (haploid) |             |          |
|                                  | less fit | equally fit | more fit | less fit          | equally fit | more fit | less fit            | equally fit | more fit | less fit            | equally fit | more fit |
| YPD                              | 0.0%     | 0.0%        | 100.0%   | 0.0%              | 8.3%        | 91.7%    | 0.0%                | 19.0%       | 81.0%    | 0.0%                | 5.0%        | 95.0%    |
| YPD + Acetic Acid                | 0.0%     | 0.0%        | 100.0%   | 0.0%              | 0.0%        | 100.0%   | 2.4%                | 54.8%       | 42.9%    | 5.0%                | 25.0%       | 70.0%    |
| YPD, 37°C                        | 2.3%     | 18.6%       | 79.1%    | 20.8%             | 18.8%       | 60.4%    | 0.0%                | 11.9%       | 88.1%    | 0.0%                | 10.0%       | 90.0%    |
| YPD, 21°C                        | 20.9%    | 51.2%       | 27.9%    | 58.3%             | 29.2%       | 12.5%    | 47.6%               | 50.0%       | 2.4%     | 0.0%                | 45.0%       | 55.0%    |
| YPD + NaCl                       | 0.0%     | 7.0%        | 93.0%    | 2.1%              | 4.2%        | 93.8%    | 0.0%                | 4.8%        | 95.2%    | 0.0%                | 0.0%        | 100.0%   |
