# Supplementary material for: Dynamics and variability in the pleiotropic effects of adaptation in laboratory budding yeast populations
Source: eLife journal article supplement (doi:10.7554/elife.70918), 2021-10-01

Assay environment

+ YPD + YPD + Acetic acid + YPD, 37°C + YPD, 21°C + YPD + NaCl

**A**

**Evolution environment**

**YPD**

**YPD + Acetic acid**

**YPD, 37°C (dip.)**

**YPD, 37°C (hap.)**

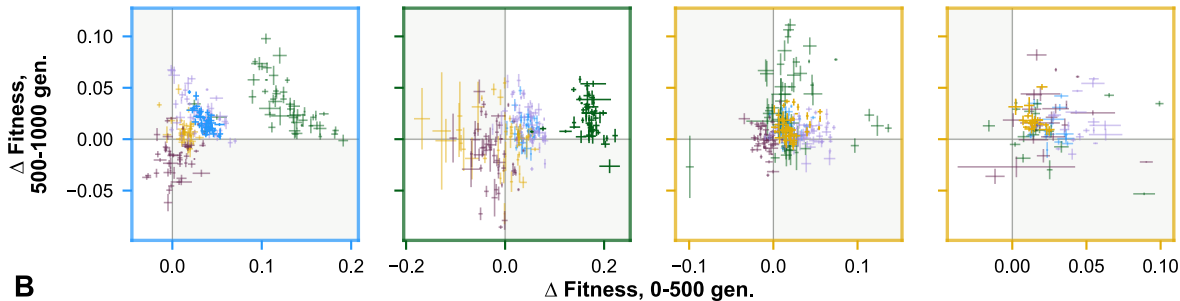

**B**

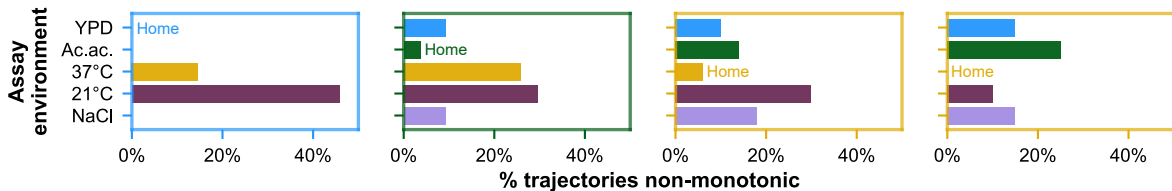

Supplement: supp [file elife-70918-supp-v1.zip]
