# Supplementary material for: Dynamics and variability in the pleiotropic effects of adaptation in laboratory budding yeast populations
Source: eLife journal article supplement (doi:10.7554/elife.70918), 2021-10-01

Assay environment

YPD YPD + Acetic acid YPD, 37°C YPD, 21°C YPD + NaCl

**A**

Outliers excluded

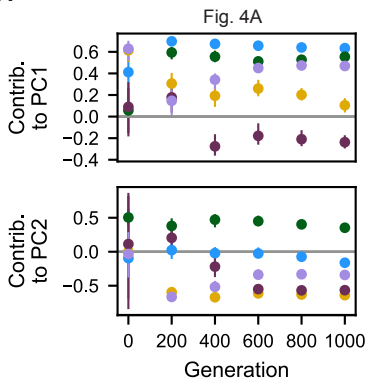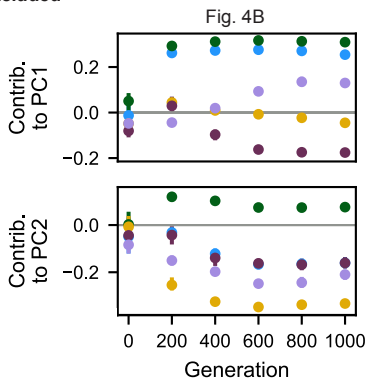

**B**

Outliers included

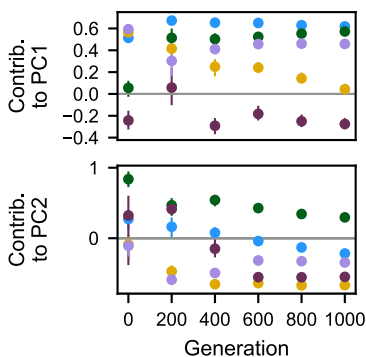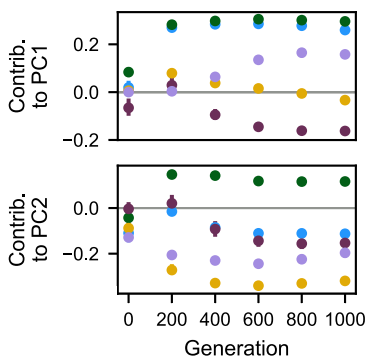

Supplement: supp [file elife-70918-supp-v1.zip]
