# Supplementary material for: Dynamics and variability in the pleiotropic effects of adaptation in laboratory budding yeast populations
Source: eLife journal article supplement (doi:10.7554/elife.70918), 2021-10-01
Supplement: supp [file elife-70918-supp-v1.zip]

# Summary of population changes in fitness over 200 generations

| Evolution environment and ploidy |          |             |          |                   |             |          |                     |             |          |                     |             |          |
|----------------------------------|----------|-------------|----------|-------------------|-------------|----------|---------------------|-------------|----------|---------------------|-------------|----------|
| Assay environment                | YPD      |             |          | YPD + Acetic acid |             |          | YPD, 37°C (diploid) |             |          | YPD, 37°C (haploid) |             |          |
|                                  | less fit | equally fit | more fit | less fit          | equally fit | more fit | less fit            | equally fit | more fit | less fit            | equally fit | more fit |
| YPD                              | 0.0%     | 25.6%       | 74.4%    | 0.0%              | 8.3%        | 91.7%    | 0.0%                | 57.1%       | 42.9%    | 0.0%                | 45.0%       | 55.0%    |
| YPD + Acetic Acid                | 0.0%     | 7.0%        | 93.0%    | 0.0%              | 2.1%        | 97.9%    | 4.8%                | 73.8%       | 21.4%    | 0.0%                | 75.0%       | 25.0%    |
| YPD, 37°C                        | 2.3%     | 72.1%       | 25.6%    | 6.2%              | 66.7%       | 27.1%    | 2.4%                | 71.4%       | 26.2%    | 0.0%                | 70.0%       | 30.0%    |
| YPD, 21°C                        | 0.0%     | 51.2%       | 48.8%    | 12.5%             | 39.6%       | 47.9%    | 11.9%               | 88.1%       | 0.0%     | 0.0%                | 90.0%       | 10.0%    |
| YPD + NaCl                       | 2.3%     | 60.5%       | 37.2%    | 6.2%              | 41.7%       | 52.1%    | 0.0%                | 35.7%       | 64.3%    | 0.0%                | 30.0%       | 70.0%    |
