# Supplementary material for: Dynamics and variability in the pleiotropic effects of adaptation in laboratory budding yeast populations
Source: eLife journal article supplement (doi:10.7554/elife.70918), 2021-10-01
Supplement: supp [file elife-70918-supp-v1.zip]

A

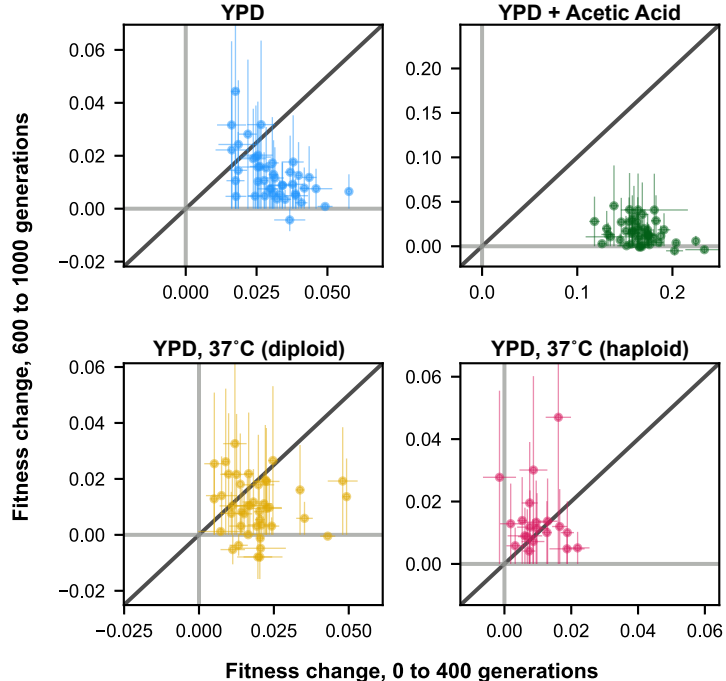

B

| Ploidy | Evolved & assayed in | $\Delta$ fitness, 0 to 400 gen. |                | $\Delta$ fitness, 600 to 1000 gen. |                | <i>n</i> | <i>t</i> | <i>p</i> |
|--------|----------------------|---------------------------------|----------------|------------------------------------|----------------|----------|----------|----------|
|        |                      | mean                            | standard error | mean                               | standard error |          |          |          |
| Dip.   | YPD                  | 0.0309                          | 0.0014         | 0.0125                             | 0.0014         | 43       | 9.079    | 2.06e-14 |
| Dip.   | YPD + Acetic Acid    | 0.1664                          | 0.0032         | 0.0154                             | 0.0019         | 48       | 40.508   | 1.31e-61 |
| Dip.   | YPD, 37°C            | 0.0192                          | 0.0016         | 0.0101                             | 0.0015         | 42       | 4.146    | 4.10e-05 |
| Hap.   | YPD, 37°C            | 0.0099                          | 0.0014         | 0.0139                             | 0.0023         | 20       | -1.479   | 9.26e-01 |
