# Supplementary material for: Dynamics and variability in the pleiotropic effects of adaptation in laboratory budding yeast populations
Source: eLife journal article supplement (doi:10.7554/elife.70918), 2021-10-01
Supplement: supp [file elife-70918-supp-v1.zip]

# Summary of population changes in fitness over 400 generations

| Evolution environment and ploidy |          |             |          |                   |             |          |                     |             |          |                     |             |          |
|----------------------------------|----------|-------------|----------|-------------------|-------------|----------|---------------------|-------------|----------|---------------------|-------------|----------|
| Assay environment                | YPD      |             |          | YPD + Acetic acid |             |          | YPD, 37°C (diploid) |             |          | YPD, 37°C (haploid) |             |          |
|                                  | less fit | equally fit | more fit | less fit          | equally fit | more fit | less fit            | equally fit | more fit | less fit            | equally fit | more fit |
| YPD                              | 0.0%     | 0.0%        | 100.0%   | 0.0%              | 10.4%       | 89.6%    | 0.0%                | 33.3%       | 66.7%    | 0.0%                | 10.0%       | 90.0%    |
| YPD + Acetic Acid                | 0.0%     | 0.0%        | 100.0%   | 0.0%              | 0.0%        | 100.0%   | 0.0%                | 57.1%       | 42.9%    | 5.0%                | 20.0%       | 75.0%    |
| YPD, 37°C                        | 4.7%     | 44.2%       | 51.2%    | 12.5%             | 33.3%       | 54.2%    | 0.0%                | 19.0%       | 81.0%    | 0.0%                | 55.0%       | 45.0%    |
| YPD, 21°C                        | 4.7%     | 48.8%       | 46.5%    | 37.5%             | 37.5%       | 25.0%    | 31.0%               | 66.7%       | 2.4%     | 0.0%                | 50.0%       | 50.0%    |
| YPD + NaCl                       | 2.3%     | 30.2%       | 67.4%    | 2.1%              | 16.7%       | 81.2%    | 0.0%                | 2.4%        | 97.6%    | 0.0%                | 0.0%        | 100.0%   |
