# Supplementary material for: Dynamics and variability in the pleiotropic effects of adaptation in laboratory budding yeast populations
Source: eLife. 2021 Oct 1;10:e70918. doi: 10.7554/eLife.70918 (PMC8579951; doi:10.7554/eLife.70918)
Supplement: Supplementary file 4. [file elife-70918-supp4.xlsx]

## Sheet: Round 1 primers
Name	Sequence	Purpose in round 1 bulk fitness assay amplification
e0>DPE-1-F3	TCG TCG GCA GCG TCA GAT GTG TAT AAG AGA CAG HHH HHH HHG GTA TCA AAT TTT ACT TAC TTT ACA ATT ACA TGC AG	Landing pad 1, generation 0 pool
e2>DPE-1-F3	TCG TCG GCA GCG TCA GAT GTG TAT AAG AGA CAG HHH HHH HHG ATG TCC TAA TTT TAC TTA CTT TAC AAT TAC ATG CAG	Landing pad 1, generation 200 pool
e4>DPE-1-F3	TCG TCG GCA GCG TCA GAT GTG TAT AAG AGA CAG HHH HHH HHC TCA TCC AGA ATT TTA CTT ACT TTA CAA TTA CAT GCA G	Landing pad 1, generation 400 pool
e6>DPE-1-F3	TCG TCG GCA GCG TCA GAT GTG TAT AAG AGA CAG HHH HHH HHG ACG GAA CTC AAT TTT ACT TAC TTT ACA ATT ACA TGC AG	Landing pad 1, generation 600 pool
e8>DPE-1-F3	TCG TCG GCA GCG TCA GAT GTG TAT AAG AGA CAG HHH HHH HHA TCG CAG GCA TAA TTT TAC TTA CTT TAC AAT TAC ATG CAG	Landing pad 1, generation 800 pool
e10>DPE-1-F3	TCG TCG GCA GCG TCA GAT GTG TAT AAG AGA CAG HHH HHH HHT CAC GAC TAG TAA ATT TTA CTT ACT TTA CAA TTA CAT GCA G	Landing pad 1, generation 1000 pool
7xx>DPE-1-R2	GTC TCG TGG GCT CGG AGA TGT GTA TAA GAG ACA GGA TAG TGT TGT AAC GCA CGG	Landing pad 1
e0>RIM1int-R-2	TCG TCG GCA GCG TCA GAT GTG TAT AAG AGA CAG HHH HHH HHG GTA TCA GAA AGG AAA TGT TAG TAA ATT ATA ACG C	Landing pad 2, generation 0 pool
e2>RIM1int-R-2	TCG TCG GCA GCG TCA GAT GTG TAT AAG AGA CAG HHH HHH HHG ATG TCC TGA AAG GAA ATG TTA GTA AAT TAT AAC GC	Landing pad 2, generation 200 pool
e4>RIM1int-R-2	TCG TCG GCA GCG TCA GAT GTG TAT AAG AGA CAG HHH HHH HHC TCA TCC AGG AAA GGA AAT GTT AGT AAA TTA TAA CGC	Landing pad 2, generation 400 pool
e6>RIM1int-R-2	TCG TCG GCA GCG TCA GAT GTG TAT AAG AGA CAG HHH HHH HHG ACG GAA CTC GAA AGG AAA TGT TAG TAA ATT ATA ACG C	Landing pad 2, generation 600 pool
e8>RIM1int-R-2	TCG TCG GCA GCG TCA GAT GTG TAT AAG AGA CAG HHH HHH HHA TCG CAG GCA TGA AAG GAA ATG TTA GTA AAT TAT AAC GC	Landing pad 2, generation 800 pool
e10>RIM1int-R-2	TCG TCG GCA GCG TCA GAT GTG TAT AAG AGA CAG HHH HHH HHT CAC GAC TAG TAG AAA GGA AAT GTT AGT AAA TTA TAA CGC	Landing pad 2, generation 1000 pool
7xx>DPE-2-F2	GTC TCG TGG GCT CGG AGA TGT GTA TAA GAG ACA GCA GAT AAT TGA AGC TGT TGC A	Landing pad 2

## Sheet: Round 2 primers
NextSeq run	Sample Name	i7 Index First index read	i5 Index Second index read
1	tp0_na-na_e0	CAAGCAGAAGACGGCATACGAGATTCGCCTTAGTCTCGTGGGCTCGG	AATGATACGGCGACCACCGAGATCTACACTAGATCGCTCGTCGGCAGCGTC
1	tp0_na-na_e2	CAAGCAGAAGACGGCATACGAGATCTAGTACGGTCTCGTGGGCTCGG	AATGATACGGCGACCACCGAGATCTACACTAGATCGCTCGTCGGCAGCGTC
1	tp0_na-na_e4	CAAGCAGAAGACGGCATACGAGATTTCTGCCTGTCTCGTGGGCTCGG	AATGATACGGCGACCACCGAGATCTACACTAGATCGCTCGTCGGCAGCGTC
1	tp0_na-na_e6	CAAGCAGAAGACGGCATACGAGATGCTCAGGAGTCTCGTGGGCTCGG	AATGATACGGCGACCACCGAGATCTACACTAGATCGCTCGTCGGCAGCGTC
1	tp0_na-na_e8	CAAGCAGAAGACGGCATACGAGATAGGAGTCCGTCTCGTGGGCTCGG	AATGATACGGCGACCACCGAGATCTACACTAGATCGCTCGTCGGCAGCGTC
1	tp0_na-na_e10	CAAGCAGAAGACGGCATACGAGATCATGCCTAGTCTCGTGGGCTCGG	AATGATACGGCGACCACCGAGATCTACACTAGATCGCTCGTCGGCAGCGTC
1	tp1_30-1_e0	CAAGCAGAAGACGGCATACGAGATGTAGAGAGGTCTCGTGGGCTCGG	AATGATACGGCGACCACCGAGATCTACACTAGATCGCTCGTCGGCAGCGTC
1	tp1_30-1_e2	CAAGCAGAAGACGGCATACGAGATCCTCTCTGGTCTCGTGGGCTCGG	AATGATACGGCGACCACCGAGATCTACACTAGATCGCTCGTCGGCAGCGTC
1	tp1_30-1_e4	CAAGCAGAAGACGGCATACGAGATAGCGTAGCGTCTCGTGGGCTCGG	AATGATACGGCGACCACCGAGATCTACACTAGATCGCTCGTCGGCAGCGTC
1	tp1_30-1_e6	CAAGCAGAAGACGGCATACGAGATCAGCCTCGGTCTCGTGGGCTCGG	AATGATACGGCGACCACCGAGATCTACACTAGATCGCTCGTCGGCAGCGTC
1	tp1_30-1_e8	CAAGCAGAAGACGGCATACGAGATTGCCTCTTGTCTCGTGGGCTCGG	AATGATACGGCGACCACCGAGATCTACACTAGATCGCTCGTCGGCAGCGTC
1	tp1_30-1_e10	CAAGCAGAAGACGGCATACGAGATTCCTCTACGTCTCGTGGGCTCGG	AATGATACGGCGACCACCGAGATCTACACTAGATCGCTCGTCGGCAGCGTC
1	tp1_30-2_e0	CAAGCAGAAGACGGCATACGAGATTCGCCTTAGTCTCGTGGGCTCGG	AATGATACGGCGACCACCGAGATCTACACCTCTCTATTCGTCGGCAGCGTC
1	tp1_30-2_e2	CAAGCAGAAGACGGCATACGAGATCTAGTACGGTCTCGTGGGCTCGG	AATGATACGGCGACCACCGAGATCTACACCTCTCTATTCGTCGGCAGCGTC
1	tp1_30-2_e4	CAAGCAGAAGACGGCATACGAGATTTCTGCCTGTCTCGTGGGCTCGG	AATGATACGGCGACCACCGAGATCTACACCTCTCTATTCGTCGGCAGCGTC
1	tp1_30-2_e6	CAAGCAGAAGACGGCATACGAGATGCTCAGGAGTCTCGTGGGCTCGG	AATGATACGGCGACCACCGAGATCTACACCTCTCTATTCGTCGGCAGCGTC
1	tp1_30-2_e8	CAAGCAGAAGACGGCATACGAGATAGGAGTCCGTCTCGTGGGCTCGG	AATGATACGGCGACCACCGAGATCTACACCTCTCTATTCGTCGGCAGCGTC
1	tp1_30-2_e10	CAAGCAGAAGACGGCATACGAGATCATGCCTAGTCTCGTGGGCTCGG	AATGATACGGCGACCACCGAGATCTACACCTCTCTATTCGTCGGCAGCGTC
1	tp1_37-1_e0	CAAGCAGAAGACGGCATACGAGATGTAGAGAGGTCTCGTGGGCTCGG	AATGATACGGCGACCACCGAGATCTACACCTCTCTATTCGTCGGCAGCGTC
1	tp1_37-1_e2	CAAGCAGAAGACGGCATACGAGATCCTCTCTGGTCTCGTGGGCTCGG	AATGATACGGCGACCACCGAGATCTACACCTCTCTATTCGTCGGCAGCGTC
1	tp1_37-1_e4	CAAGCAGAAGACGGCATACGAGATAGCGTAGCGTCTCGTGGGCTCGG	AATGATACGGCGACCACCGAGATCTACACCTCTCTATTCGTCGGCAGCGTC
1	tp1_37-1_e6	CAAGCAGAAGACGGCATACGAGATCAGCCTCGGTCTCGTGGGCTCGG	AATGATACGGCGACCACCGAGATCTACACCTCTCTATTCGTCGGCAGCGTC
1	tp1_37-1_e8	CAAGCAGAAGACGGCATACGAGATTGCCTCTTGTCTCGTGGGCTCGG	AATGATACGGCGACCACCGAGATCTACACCTCTCTATTCGTCGGCAGCGTC
1	tp1_37-1_e10	CAAGCAGAAGACGGCATACGAGATTCCTCTACGTCTCGTGGGCTCGG	AATGATACGGCGACCACCGAGATCTACACCTCTCTATTCGTCGGCAGCGTC
1	tp1_37-2_e0	CAAGCAGAAGACGGCATACGAGATTCGCCTTAGTCTCGTGGGCTCGG	AATGATACGGCGACCACCGAGATCTACACTATCCTCTTCGTCGGCAGCGTC
1	tp1_37-2_e2	CAAGCAGAAGACGGCATACGAGATCTAGTACGGTCTCGTGGGCTCGG	AATGATACGGCGACCACCGAGATCTACACTATCCTCTTCGTCGGCAGCGTC
1	tp1_37-2_e4	CAAGCAGAAGACGGCATACGAGATTTCTGCCTGTCTCGTGGGCTCGG	AATGATACGGCGACCACCGAGATCTACACTATCCTCTTCGTCGGCAGCGTC
1	tp1_37-2_e6	CAAGCAGAAGACGGCATACGAGATGCTCAGGAGTCTCGTGGGCTCGG	AATGATACGGCGACCACCGAGATCTACACTATCCTCTTCGTCGGCAGCGTC
1	tp1_37-2_e8	CAAGCAGAAGACGGCATACGAGATAGGAGTCCGTCTCGTGGGCTCGG	AATGATACGGCGACCACCGAGATCTACACTATCCTCTTCGTCGGCAGCGTC
1	tp1_37-2_e10	CAAGCAGAAGACGGCATACGAGATCATGCCTAGTCTCGTGGGCTCGG	AATGATACGGCGACCACCGAGATCTACACTATCCTCTTCGTCGGCAGCGTC
1	tp1_AA-1_e0	CAAGCAGAAGACGGCATACGAGATGTAGAGAGGTCTCGTGGGCTCGG	AATGATACGGCGACCACCGAGATCTACACTATCCTCTTCGTCGGCAGCGTC
1	tp1_AA-1_e2	CAAGCAGAAGACGGCATACGAGATCCTCTCTGGTCTCGTGGGCTCGG	AATGATACGGCGACCACCGAGATCTACACTATCCTCTTCGTCGGCAGCGTC
1	tp1_AA-1_e4	CAAGCAGAAGACGGCATACGAGATAGCGTAGCGTCTCGTGGGCTCGG	AATGATACGGCGACCACCGAGATCTACACTATCCTCTTCGTCGGCAGCGTC
1	tp1_AA-1_e6	CAAGCAGAAGACGGCATACGAGATCAGCCTCGGTCTCGTGGGCTCGG	AATGATACGGCGACCACCGAGATCTACACTATCCTCTTCGTCGGCAGCGTC
1	tp1_AA-1_e8	CAAGCAGAAGACGGCATACGAGATTGCCTCTTGTCTCGTGGGCTCGG	AATGATACGGCGACCACCGAGATCTACACTATCCTCTTCGTCGGCAGCGTC
1	tp1_AA-1_e10	CAAGCAGAAGACGGCATACGAGATTCCTCTACGTCTCGTGGGCTCGG	AATGATACGGCGACCACCGAGATCTACACTATCCTCTTCGTCGGCAGCGTC
1	tp1_AA-2_e0	CAAGCAGAAGACGGCATACGAGATTCGCCTTAGTCTCGTGGGCTCGG	AATGATACGGCGACCACCGAGATCTACACAGAGTAGATCGTCGGCAGCGTC
1	tp1_AA-2_e2	CAAGCAGAAGACGGCATACGAGATCTAGTACGGTCTCGTGGGCTCGG	AATGATACGGCGACCACCGAGATCTACACAGAGTAGATCGTCGGCAGCGTC
1	tp1_AA-2_e4	CAAGCAGAAGACGGCATACGAGATTTCTGCCTGTCTCGTGGGCTCGG	AATGATACGGCGACCACCGAGATCTACACAGAGTAGATCGTCGGCAGCGTC
1	tp1_AA-2_e6	CAAGCAGAAGACGGCATACGAGATGCTCAGGAGTCTCGTGGGCTCGG	AATGATACGGCGACCACCGAGATCTACACAGAGTAGATCGTCGGCAGCGTC
1	tp1_AA-2_e8	CAAGCAGAAGACGGCATACGAGATAGGAGTCCGTCTCGTGGGCTCGG	AATGATACGGCGACCACCGAGATCTACACAGAGTAGATCGTCGGCAGCGTC
1	tp1_AA-2_e10	CAAGCAGAAGACGGCATACGAGATCATGCCTAGTCTCGTGGGCTCGG	AATGATACGGCGACCACCGAGATCTACACAGAGTAGATCGTCGGCAGCGTC
1	tp1_NaCl-1_e0	CAAGCAGAAGACGGCATACGAGATGTAGAGAGGTCTCGTGGGCTCGG	AATGATACGGCGACCACCGAGATCTACACAGAGTAGATCGTCGGCAGCGTC
1	tp1_NaCl-1_e2	CAAGCAGAAGACGGCATACGAGATCCTCTCTGGTCTCGTGGGCTCGG	AATGATACGGCGACCACCGAGATCTACACAGAGTAGATCGTCGGCAGCGTC
1	tp1_NaCl-1_e4	CAAGCAGAAGACGGCATACGAGATAGCGTAGCGTCTCGTGGGCTCGG	AATGATACGGCGACCACCGAGATCTACACAGAGTAGATCGTCGGCAGCGTC
1	tp1_NaCl-1_e6	CAAGCAGAAGACGGCATACGAGATCAGCCTCGGTCTCGTGGGCTCGG	AATGATACGGCGACCACCGAGATCTACACAGAGTAGATCGTCGGCAGCGTC
1	tp1_NaCl-1_e8	CAAGCAGAAGACGGCATACGAGATTGCCTCTTGTCTCGTGGGCTCGG	AATGATACGGCGACCACCGAGATCTACACAGAGTAGATCGTCGGCAGCGTC
1	tp1_NaCl-1_e10	CAAGCAGAAGACGGCATACGAGATTCCTCTACGTCTCGTGGGCTCGG	AATGATACGGCGACCACCGAGATCTACACAGAGTAGATCGTCGGCAGCGTC
1	tp1_NaCl-2_e0	CAAGCAGAAGACGGCATACGAGATTCGCCTTAGTCTCGTGGGCTCGG	AATGATACGGCGACCACCGAGATCTACACGTAAGGAGTCGTCGGCAGCGTC
1	tp1_NaCl-2_e2	CAAGCAGAAGACGGCATACGAGATCTAGTACGGTCTCGTGGGCTCGG	AATGATACGGCGACCACCGAGATCTACACGTAAGGAGTCGTCGGCAGCGTC
1	tp1_NaCl-2_e4	CAAGCAGAAGACGGCATACGAGATTTCTGCCTGTCTCGTGGGCTCGG	AATGATACGGCGACCACCGAGATCTACACGTAAGGAGTCGTCGGCAGCGTC
1	tp1_NaCl-2_e6	CAAGCAGAAGACGGCATACGAGATGCTCAGGAGTCTCGTGGGCTCGG	AATGATACGGCGACCACCGAGATCTACACGTAAGGAGTCGTCGGCAGCGTC
1	tp1_NaCl-2_e8	CAAGCAGAAGACGGCATACGAGATAGGAGTCCGTCTCGTGGGCTCGG	AATGATACGGCGACCACCGAGATCTACACGTAAGGAGTCGTCGGCAGCGTC
1	tp1_NaCl-2_e10	CAAGCAGAAGACGGCATACGAGATCATGCCTAGTCTCGTGGGCTCGG	AATGATACGGCGACCACCGAGATCTACACGTAAGGAGTCGTCGGCAGCGTC
1	tp1_RT-1_e0	CAAGCAGAAGACGGCATACGAGATGTAGAGAGGTCTCGTGGGCTCGG	AATGATACGGCGACCACCGAGATCTACACGTAAGGAGTCGTCGGCAGCGTC
1	tp1_RT-1_e2	CAAGCAGAAGACGGCATACGAGATCCTCTCTGGTCTCGTGGGCTCGG	AATGATACGGCGACCACCGAGATCTACACGTAAGGAGTCGTCGGCAGCGTC
1	tp1_RT-1_e4	CAAGCAGAAGACGGCATACGAGATAGCGTAGCGTCTCGTGGGCTCGG	AATGATACGGCGACCACCGAGATCTACACGTAAGGAGTCGTCGGCAGCGTC
1	tp1_RT-1_e6	CAAGCAGAAGACGGCATACGAGATCAGCCTCGGTCTCGTGGGCTCGG	AATGATACGGCGACCACCGAGATCTACACGTAAGGAGTCGTCGGCAGCGTC
1	tp1_RT-1_e8	CAAGCAGAAGACGGCATACGAGATTGCCTCTTGTCTCGTGGGCTCGG	AATGATACGGCGACCACCGAGATCTACACGTAAGGAGTCGTCGGCAGCGTC
1	tp1_RT-1_e10	CAAGCAGAAGACGGCATACGAGATTCCTCTACGTCTCGTGGGCTCGG	AATGATACGGCGACCACCGAGATCTACACGTAAGGAGTCGTCGGCAGCGTC
1	tp1_RT-2_e0	CAAGCAGAAGACGGCATACGAGATTCGCCTTAGTCTCGTGGGCTCGG	AATGATACGGCGACCACCGAGATCTACACACTGCATATCGTCGGCAGCGTC
1	tp1_RT-2_e2	CAAGCAGAAGACGGCATACGAGATCTAGTACGGTCTCGTGGGCTCGG	AATGATACGGCGACCACCGAGATCTACACACTGCATATCGTCGGCAGCGTC
1	tp1_RT-2_e4	CAAGCAGAAGACGGCATACGAGATTTCTGCCTGTCTCGTGGGCTCGG	AATGATACGGCGACCACCGAGATCTACACACTGCATATCGTCGGCAGCGTC
1	tp1_RT-2_e6	CAAGCAGAAGACGGCATACGAGATGCTCAGGAGTCTCGTGGGCTCGG	AATGATACGGCGACCACCGAGATCTACACACTGCATATCGTCGGCAGCGTC
1	tp1_RT-2_e8	CAAGCAGAAGACGGCATACGAGATAGGAGTCCGTCTCGTGGGCTCGG	AATGATACGGCGACCACCGAGATCTACACACTGCATATCGTCGGCAGCGTC
1	tp1_RT-2_e10	CAAGCAGAAGACGGCATACGAGATCATGCCTAGTCTCGTGGGCTCGG	AATGATACGGCGACCACCGAGATCTACACACTGCATATCGTCGGCAGCGTC
1	tp3_30-1_e0	CAAGCAGAAGACGGCATACGAGATGTAGAGAGGTCTCGTGGGCTCGG	AATGATACGGCGACCACCGAGATCTACACACTGCATATCGTCGGCAGCGTC
1	tp3_30-1_e2	CAAGCAGAAGACGGCATACGAGATCCTCTCTGGTCTCGTGGGCTCGG	AATGATACGGCGACCACCGAGATCTACACACTGCATATCGTCGGCAGCGTC
1	tp3_30-1_e4	CAAGCAGAAGACGGCATACGAGATAGCGTAGCGTCTCGTGGGCTCGG	AATGATACGGCGACCACCGAGATCTACACACTGCATATCGTCGGCAGCGTC
1	tp3_30-1_e6	CAAGCAGAAGACGGCATACGAGATCAGCCTCGGTCTCGTGGGCTCGG	AATGATACGGCGACCACCGAGATCTACACACTGCATATCGTCGGCAGCGTC
1	tp3_30-1_e8	CAAGCAGAAGACGGCATACGAGATTGCCTCTTGTCTCGTGGGCTCGG	AATGATACGGCGACCACCGAGATCTACACACTGCATATCGTCGGCAGCGTC
1	tp3_30-1_e10	CAAGCAGAAGACGGCATACGAGATTCCTCTACGTCTCGTGGGCTCGG	AATGATACGGCGACCACCGAGATCTACACACTGCATATCGTCGGCAGCGTC
1	tp3_30-2_e0	CAAGCAGAAGACGGCATACGAGATTCGCCTTAGTCTCGTGGGCTCGG	AATGATACGGCGACCACCGAGATCTACACAAGGAGTATCGTCGGCAGCGTC
1	tp3_30-2_e2	CAAGCAGAAGACGGCATACGAGATCTAGTACGGTCTCGTGGGCTCGG	AATGATACGGCGACCACCGAGATCTACACAAGGAGTATCGTCGGCAGCGTC
1	tp3_30-2_e4	CAAGCAGAAGACGGCATACGAGATTTCTGCCTGTCTCGTGGGCTCGG	AATGATACGGCGACCACCGAGATCTACACAAGGAGTATCGTCGGCAGCGTC
1	tp3_30-2_e6	CAAGCAGAAGACGGCATACGAGATGCTCAGGAGTCTCGTGGGCTCGG	AATGATACGGCGACCACCGAGATCTACACAAGGAGTATCGTCGGCAGCGTC
1	tp3_30-2_e8	CAAGCAGAAGACGGCATACGAGATAGGAGTCCGTCTCGTGGGCTCGG	AATGATACGGCGACCACCGAGATCTACACAAGGAGTATCGTCGGCAGCGTC
1	tp3_30-2_e10	CAAGCAGAAGACGGCATACGAGATCATGCCTAGTCTCGTGGGCTCGG	AATGATACGGCGACCACCGAGATCTACACAAGGAGTATCGTCGGCAGCGTC
1	tp3_37-1_e0	CAAGCAGAAGACGGCATACGAGATGTAGAGAGGTCTCGTGGGCTCGG	AATGATACGGCGACCACCGAGATCTACACAAGGAGTATCGTCGGCAGCGTC
1	tp3_37-1_e2	CAAGCAGAAGACGGCATACGAGATCCTCTCTGGTCTCGTGGGCTCGG	AATGATACGGCGACCACCGAGATCTACACAAGGAGTATCGTCGGCAGCGTC
1	tp3_37-1_e4	CAAGCAGAAGACGGCATACGAGATAGCGTAGCGTCTCGTGGGCTCGG	AATGATACGGCGACCACCGAGATCTACACAAGGAGTATCGTCGGCAGCGTC
1	tp3_37-1_e6	CAAGCAGAAGACGGCATACGAGATCAGCCTCGGTCTCGTGGGCTCGG	AATGATACGGCGACCACCGAGATCTACACAAGGAGTATCGTCGGCAGCGTC
1	tp3_37-1_e8	CAAGCAGAAGACGGCATACGAGATTGCCTCTTGTCTCGTGGGCTCGG	AATGATACGGCGACCACCGAGATCTACACAAGGAGTATCGTCGGCAGCGTC
1	tp3_37-1_e10	CAAGCAGAAGACGGCATACGAGATTCCTCTACGTCTCGTGGGCTCGG	AATGATACGGCGACCACCGAGATCTACACAAGGAGTATCGTCGGCAGCGTC
1	tp3_37-2_e0	CAAGCAGAAGACGGCATACGAGATTCGCCTTAGTCTCGTGGGCTCGG	AATGATACGGCGACCACCGAGATCTACACCTAAGCCTTCGTCGGCAGCGTC
1	tp3_37-2_e2	CAAGCAGAAGACGGCATACGAGATCTAGTACGGTCTCGTGGGCTCGG	AATGATACGGCGACCACCGAGATCTACACCTAAGCCTTCGTCGGCAGCGTC
1	tp3_37-2_e4	CAAGCAGAAGACGGCATACGAGATTTCTGCCTGTCTCGTGGGCTCGG	AATGATACGGCGACCACCGAGATCTACACCTAAGCCTTCGTCGGCAGCGTC
1	tp3_37-2_e6	CAAGCAGAAGACGGCATACGAGATGCTCAGGAGTCTCGTGGGCTCGG	AATGATACGGCGACCACCGAGATCTACACCTAAGCCTTCGTCGGCAGCGTC
1	tp3_37-2_e8	CAAGCAGAAGACGGCATACGAGATAGGAGTCCGTCTCGTGGGCTCGG	AATGATACGGCGACCACCGAGATCTACACCTAAGCCTTCGTCGGCAGCGTC
1	tp3_37-2_e10	CAAGCAGAAGACGGCATACGAGATCATGCCTAGTCTCGTGGGCTCGG	AATGATACGGCGACCACCGAGATCTACACCTAAGCCTTCGTCGGCAGCGTC
1	tp3_AA-1_e0	CAAGCAGAAGACGGCATACGAGATGTAGAGAGGTCTCGTGGGCTCGG	AATGATACGGCGACCACCGAGATCTACACCTAAGCCTTCGTCGGCAGCGTC
1	tp3_AA-1_e2	CAAGCAGAAGACGGCATACGAGATCCTCTCTGGTCTCGTGGGCTCGG	AATGATACGGCGACCACCGAGATCTACACCTAAGCCTTCGTCGGCAGCGTC
1	tp3_AA-1_e4	CAAGCAGAAGACGGCATACGAGATAGCGTAGCGTCTCGTGGGCTCGG	AATGATACGGCGACCACCGAGATCTACACCTAAGCCTTCGTCGGCAGCGTC
1	tp3_AA-1_e6	CAAGCAGAAGACGGCATACGAGATCAGCCTCGGTCTCGTGGGCTCGG	AATGATACGGCGACCACCGAGATCTACACCTAAGCCTTCGTCGGCAGCGTC
1	tp3_AA-1_e8	CAAGCAGAAGACGGCATACGAGATTGCCTCTTGTCTCGTGGGCTCGG	AATGATACGGCGACCACCGAGATCTACACCTAAGCCTTCGTCGGCAGCGTC
1	tp3_AA-1_e10	CAAGCAGAAGACGGCATACGAGATTCCTCTACGTCTCGTGGGCTCGG	AATGATACGGCGACCACCGAGATCTACACCTAAGCCTTCGTCGGCAGCGTC
1	tp3_AA-2_e0	CAAGCAGAAGACGGCATACGAGATATTACAATGTCTCGTGGGCTCGG	AATGATACGGCGACCACCGAGATCTACACGGCTACTCTCGTCGGCAGCGTC
1	tp3_AA-2_e2	CAAGCAGAAGACGGCATACGAGATGAATGATCGTCTCGTGGGCTCGG	AATGATACGGCGACCACCGAGATCTACACGGCTACTCTCGTCGGCAGCGTC
1	tp3_AA-2_e4	CAAGCAGAAGACGGCATACGAGATCGATCGGTGTCTCGTGGGCTCGG	AATGATACGGCGACCACCGAGATCTACACGGCTACTCTCGTCGGCAGCGTC
1	tp3_AA-2_e6	CAAGCAGAAGACGGCATACGAGATAATAACGGGTCTCGTGGGCTCGG	AATGATACGGCGACCACCGAGATCTACACGGCTACTCTCGTCGGCAGCGTC
1	tp3_AA-2_e8	CAAGCAGAAGACGGCATACGAGATTAGAAGAAGTCTCGTGGGCTCGG	AATGATACGGCGACCACCGAGATCTACACGGCTACTCTCGTCGGCAGCGTC
1	tp3_AA-2_e10	CAAGCAGAAGACGGCATACGAGATGTCAGGTAGTCTCGTGGGCTCGG	AATGATACGGCGACCACCGAGATCTACACGGCTACTCTCGTCGGCAGCGTC
1	tp3_NaCl-1_e0	CAAGCAGAAGACGGCATACGAGATGCGGTCCTGTCTCGTGGGCTCGG	AATGATACGGCGACCACCGAGATCTACACGGCTACTCTCGTCGGCAGCGTC
1	tp3_NaCl-1_e2	CAAGCAGAAGACGGCATACGAGATAATCGGACGTCTCGTGGGCTCGG	AATGATACGGCGACCACCGAGATCTACACGGCTACTCTCGTCGGCAGCGTC
1	tp3_NaCl-1_e4	CAAGCAGAAGACGGCATACGAGATAACTCGTGGTCTCGTGGGCTCGG	AATGATACGGCGACCACCGAGATCTACACGGCTACTCTCGTCGGCAGCGTC
1	tp3_NaCl-1_e6	CAAGCAGAAGACGGCATACGAGATGGCCGTGGGTCTCGTGGGCTCGG	AATGATACGGCGACCACCGAGATCTACACGGCTACTCTCGTCGGCAGCGTC
1	tp3_NaCl-1_e8	CAAGCAGAAGACGGCATACGAGATTTACATGTGTCTCGTGGGCTCGG	AATGATACGGCGACCACCGAGATCTACACGGCTACTCTCGTCGGCAGCGTC
1	tp3_NaCl-1_e10	CAAGCAGAAGACGGCATACGAGATAGTTAACAGTCTCGTGGGCTCGG	AATGATACGGCGACCACCGAGATCTACACGGCTACTCTCGTCGGCAGCGTC
1	tp3_NaCl-2_e0	CAAGCAGAAGACGGCATACGAGATATTACAATGTCTCGTGGGCTCGG	AATGATACGGCGACCACCGAGATCTACACCCTCAGACTCGTCGGCAGCGTC
1	tp3_NaCl-2_e2	CAAGCAGAAGACGGCATACGAGATGAATGATCGTCTCGTGGGCTCGG	AATGATACGGCGACCACCGAGATCTACACCCTCAGACTCGTCGGCAGCGTC
1	tp3_NaCl-2_e4	CAAGCAGAAGACGGCATACGAGATCGATCGGTGTCTCGTGGGCTCGG	AATGATACGGCGACCACCGAGATCTACACCCTCAGACTCGTCGGCAGCGTC
1	tp3_NaCl-2_e6	CAAGCAGAAGACGGCATACGAGATAATAACGGGTCTCGTGGGCTCGG	AATGATACGGCGACCACCGAGATCTACACCCTCAGACTCGTCGGCAGCGTC
1	tp3_NaCl-2_e8	CAAGCAGAAGACGGCATACGAGATTAGAAGAAGTCTCGTGGGCTCGG	AATGATACGGCGACCACCGAGATCTACACCCTCAGACTCGTCGGCAGCGTC
1	tp3_NaCl-2_e10	CAAGCAGAAGACGGCATACGAGATGTCAGGTAGTCTCGTGGGCTCGG	AATGATACGGCGACCACCGAGATCTACACCCTCAGACTCGTCGGCAGCGTC
1	tp3_RT-1_e0	CAAGCAGAAGACGGCATACGAGATGCGGTCCTGTCTCGTGGGCTCGG	AATGATACGGCGACCACCGAGATCTACACCCTCAGACTCGTCGGCAGCGTC
1	tp3_RT-1_e2	CAAGCAGAAGACGGCATACGAGATAATCGGACGTCTCGTGGGCTCGG	AATGATACGGCGACCACCGAGATCTACACCCTCAGACTCGTCGGCAGCGTC
1	tp3_RT-1_e4	CAAGCAGAAGACGGCATACGAGATAACTCGTGGTCTCGTGGGCTCGG	AATGATACGGCGACCACCGAGATCTACACCCTCAGACTCGTCGGCAGCGTC
1	tp3_RT-1_e6	CAAGCAGAAGACGGCATACGAGATGGCCGTGGGTCTCGTGGGCTCGG	AATGATACGGCGACCACCGAGATCTACACCCTCAGACTCGTCGGCAGCGTC
1	tp3_RT-1_e8	CAAGCAGAAGACGGCATACGAGATTTACATGTGTCTCGTGGGCTCGG	AATGATACGGCGACCACCGAGATCTACACCCTCAGACTCGTCGGCAGCGTC
1	tp3_RT-1_e10	CAAGCAGAAGACGGCATACGAGATAGTTAACAGTCTCGTGGGCTCGG	AATGATACGGCGACCACCGAGATCTACACCCTCAGACTCGTCGGCAGCGTC
1	tp3_RT-2_e0	CAAGCAGAAGACGGCATACGAGATATTACAATGTCTCGTGGGCTCGG	AATGATACGGCGACCACCGAGATCTACACTCCTTACGTCGTCGGCAGCGTC
1	tp3_RT-2_e2	CAAGCAGAAGACGGCATACGAGATGAATGATCGTCTCGTGGGCTCGG	AATGATACGGCGACCACCGAGATCTACACTCCTTACGTCGTCGGCAGCGTC
1	tp3_RT-2_e4	CAAGCAGAAGACGGCATACGAGATCGATCGGTGTCTCGTGGGCTCGG	AATGATACGGCGACCACCGAGATCTACACTCCTTACGTCGTCGGCAGCGTC
1	tp3_RT-2_e6	CAAGCAGAAGACGGCATACGAGATAATAACGGGTCTCGTGGGCTCGG	AATGATACGGCGACCACCGAGATCTACACTCCTTACGTCGTCGGCAGCGTC
1	tp3_RT-2_e8	CAAGCAGAAGACGGCATACGAGATTAGAAGAAGTCTCGTGGGCTCGG	AATGATACGGCGACCACCGAGATCTACACTCCTTACGTCGTCGGCAGCGTC
1	tp3_RT-2_e10	CAAGCAGAAGACGGCATACGAGATGTCAGGTAGTCTCGTGGGCTCGG	AATGATACGGCGACCACCGAGATCTACACTCCTTACGTCGTCGGCAGCGTC
1	tp5_30-1_e0	CAAGCAGAAGACGGCATACGAGATGCGGTCCTGTCTCGTGGGCTCGG	AATGATACGGCGACCACCGAGATCTACACTCCTTACGTCGTCGGCAGCGTC
1	tp5_30-1_e2	CAAGCAGAAGACGGCATACGAGATAATCGGACGTCTCGTGGGCTCGG	AATGATACGGCGACCACCGAGATCTACACTCCTTACGTCGTCGGCAGCGTC
1	tp5_30-1_e4	CAAGCAGAAGACGGCATACGAGATAACTCGTGGTCTCGTGGGCTCGG	AATGATACGGCGACCACCGAGATCTACACTCCTTACGTCGTCGGCAGCGTC
1	tp5_30-1_e6	CAAGCAGAAGACGGCATACGAGATGGCCGTGGGTCTCGTGGGCTCGG	AATGATACGGCGACCACCGAGATCTACACTCCTTACGTCGTCGGCAGCGTC
1	tp5_30-1_e8	CAAGCAGAAGACGGCATACGAGATTTACATGTGTCTCGTGGGCTCGG	AATGATACGGCGACCACCGAGATCTACACTCCTTACGTCGTCGGCAGCGTC
1	tp5_30-1_e10	CAAGCAGAAGACGGCATACGAGATAGTTAACAGTCTCGTGGGCTCGG	AATGATACGGCGACCACCGAGATCTACACTCCTTACGTCGTCGGCAGCGTC
1	tp5_30-2_e0	CAAGCAGAAGACGGCATACGAGATATTACAATGTCTCGTGGGCTCGG	AATGATACGGCGACCACCGAGATCTACACACGCGTGGTCGTCGGCAGCGTC
1	tp5_30-2_e2	CAAGCAGAAGACGGCATACGAGATGAATGATCGTCTCGTGGGCTCGG	AATGATACGGCGACCACCGAGATCTACACACGCGTGGTCGTCGGCAGCGTC
1	tp5_30-2_e4	CAAGCAGAAGACGGCATACGAGATCGATCGGTGTCTCGTGGGCTCGG	AATGATACGGCGACCACCGAGATCTACACACGCGTGGTCGTCGGCAGCGTC
1	tp5_30-2_e6	CAAGCAGAAGACGGCATACGAGATAATAACGGGTCTCGTGGGCTCGG	AATGATACGGCGACCACCGAGATCTACACACGCGTGGTCGTCGGCAGCGTC
1	tp5_30-2_e8	CAAGCAGAAGACGGCATACGAGATTAGAAGAAGTCTCGTGGGCTCGG	AATGATACGGCGACCACCGAGATCTACACACGCGTGGTCGTCGGCAGCGTC
1	tp5_30-2_e10	CAAGCAGAAGACGGCATACGAGATGTCAGGTAGTCTCGTGGGCTCGG	AATGATACGGCGACCACCGAGATCTACACACGCGTGGTCGTCGGCAGCGTC
1	tp5_37-1_e0	CAAGCAGAAGACGGCATACGAGATGCGGTCCTGTCTCGTGGGCTCGG	AATGATACGGCGACCACCGAGATCTACACACGCGTGGTCGTCGGCAGCGTC
1	tp5_37-1_e2	CAAGCAGAAGACGGCATACGAGATAATCGGACGTCTCGTGGGCTCGG	AATGATACGGCGACCACCGAGATCTACACACGCGTGGTCGTCGGCAGCGTC
1	tp5_37-1_e4	CAAGCAGAAGACGGCATACGAGATAACTCGTGGTCTCGTGGGCTCGG	AATGATACGGCGACCACCGAGATCTACACACGCGTGGTCGTCGGCAGCGTC
1	tp5_37-1_e6	CAAGCAGAAGACGGCATACGAGATGGCCGTGGGTCTCGTGGGCTCGG	AATGATACGGCGACCACCGAGATCTACACACGCGTGGTCGTCGGCAGCGTC
1	tp5_37-1_e8	CAAGCAGAAGACGGCATACGAGATTTACATGTGTCTCGTGGGCTCGG	AATGATACGGCGACCACCGAGATCTACACACGCGTGGTCGTCGGCAGCGTC
1	tp5_37-1_e10	CAAGCAGAAGACGGCATACGAGATAGTTAACAGTCTCGTGGGCTCGG	AATGATACGGCGACCACCGAGATCTACACACGCGTGGTCGTCGGCAGCGTC
1	tp5_37-2_e0	CAAGCAGAAGACGGCATACGAGATATTACAATGTCTCGTGGGCTCGG	AATGATACGGCGACCACCGAGATCTACACGGAACTCCTCGTCGGCAGCGTC
1	tp5_37-2_e2	CAAGCAGAAGACGGCATACGAGATGAATGATCGTCTCGTGGGCTCGG	AATGATACGGCGACCACCGAGATCTACACGGAACTCCTCGTCGGCAGCGTC
1	tp5_37-2_e4	CAAGCAGAAGACGGCATACGAGATCGATCGGTGTCTCGTGGGCTCGG	AATGATACGGCGACCACCGAGATCTACACGGAACTCCTCGTCGGCAGCGTC
1	tp5_37-2_e6	CAAGCAGAAGACGGCATACGAGATAATAACGGGTCTCGTGGGCTCGG	AATGATACGGCGACCACCGAGATCTACACGGAACTCCTCGTCGGCAGCGTC
1	tp5_37-2_e8	CAAGCAGAAGACGGCATACGAGATTAGAAGAAGTCTCGTGGGCTCGG	AATGATACGGCGACCACCGAGATCTACACGGAACTCCTCGTCGGCAGCGTC
1	tp5_37-2_e10	CAAGCAGAAGACGGCATACGAGATGTCAGGTAGTCTCGTGGGCTCGG	AATGATACGGCGACCACCGAGATCTACACGGAACTCCTCGTCGGCAGCGTC
1	tp5_AA-1_e0	CAAGCAGAAGACGGCATACGAGATGCGGTCCTGTCTCGTGGGCTCGG	AATGATACGGCGACCACCGAGATCTACACGGAACTCCTCGTCGGCAGCGTC
1	tp5_AA-1_e2	CAAGCAGAAGACGGCATACGAGATAATCGGACGTCTCGTGGGCTCGG	AATGATACGGCGACCACCGAGATCTACACGGAACTCCTCGTCGGCAGCGTC
1	tp5_AA-1_e4	CAAGCAGAAGACGGCATACGAGATAACTCGTGGTCTCGTGGGCTCGG	AATGATACGGCGACCACCGAGATCTACACGGAACTCCTCGTCGGCAGCGTC
1	tp5_AA-1_e6	CAAGCAGAAGACGGCATACGAGATGGCCGTGGGTCTCGTGGGCTCGG	AATGATACGGCGACCACCGAGATCTACACGGAACTCCTCGTCGGCAGCGTC
1	tp5_AA-1_e8	CAAGCAGAAGACGGCATACGAGATTTACATGTGTCTCGTGGGCTCGG	AATGATACGGCGACCACCGAGATCTACACGGAACTCCTCGTCGGCAGCGTC
1	tp5_AA-1_e10	CAAGCAGAAGACGGCATACGAGATAGTTAACAGTCTCGTGGGCTCGG	AATGATACGGCGACCACCGAGATCTACACGGAACTCCTCGTCGGCAGCGTC
1	tp5_AA-2_e0	CAAGCAGAAGACGGCATACGAGATATTACAATGTCTCGTGGGCTCGG	AATGATACGGCGACCACCGAGATCTACACTGGCCATGTCGTCGGCAGCGTC
1	tp5_AA-2_e2	CAAGCAGAAGACGGCATACGAGATGAATGATCGTCTCGTGGGCTCGG	AATGATACGGCGACCACCGAGATCTACACTGGCCATGTCGTCGGCAGCGTC
1	tp5_AA-2_e4	CAAGCAGAAGACGGCATACGAGATCGATCGGTGTCTCGTGGGCTCGG	AATGATACGGCGACCACCGAGATCTACACTGGCCATGTCGTCGGCAGCGTC
1	tp5_AA-2_e6	CAAGCAGAAGACGGCATACGAGATAATAACGGGTCTCGTGGGCTCGG	AATGATACGGCGACCACCGAGATCTACACTGGCCATGTCGTCGGCAGCGTC
1	tp5_AA-2_e8	CAAGCAGAAGACGGCATACGAGATTAGAAGAAGTCTCGTGGGCTCGG	AATGATACGGCGACCACCGAGATCTACACTGGCCATGTCGTCGGCAGCGTC
1	tp5_AA-2_e10	CAAGCAGAAGACGGCATACGAGATGTCAGGTAGTCTCGTGGGCTCGG	AATGATACGGCGACCACCGAGATCTACACTGGCCATGTCGTCGGCAGCGTC
1	tp5_NaCl-1_e0	CAAGCAGAAGACGGCATACGAGATGCGGTCCTGTCTCGTGGGCTCGG	AATGATACGGCGACCACCGAGATCTACACTGGCCATGTCGTCGGCAGCGTC
1	tp5_NaCl-1_e2	CAAGCAGAAGACGGCATACGAGATAATCGGACGTCTCGTGGGCTCGG	AATGATACGGCGACCACCGAGATCTACACTGGCCATGTCGTCGGCAGCGTC
1	tp5_NaCl-1_e4	CAAGCAGAAGACGGCATACGAGATAACTCGTGGTCTCGTGGGCTCGG	AATGATACGGCGACCACCGAGATCTACACTGGCCATGTCGTCGGCAGCGTC
1	tp5_NaCl-1_e6	CAAGCAGAAGACGGCATACGAGATGGCCGTGGGTCTCGTGGGCTCGG	AATGATACGGCGACCACCGAGATCTACACTGGCCATGTCGTCGGCAGCGTC
1	tp5_NaCl-1_e8	CAAGCAGAAGACGGCATACGAGATTTACATGTGTCTCGTGGGCTCGG	AATGATACGGCGACCACCGAGATCTACACTGGCCATGTCGTCGGCAGCGTC
1	tp5_NaCl-1_e10	CAAGCAGAAGACGGCATACGAGATAGTTAACAGTCTCGTGGGCTCGG	AATGATACGGCGACCACCGAGATCTACACTGGCCATGTCGTCGGCAGCGTC
1	tp5_NaCl-2_e0	CAAGCAGAAGACGGCATACGAGATATTACAATGTCTCGTGGGCTCGG	AATGATACGGCGACCACCGAGATCTACACGAGAGATTTCGTCGGCAGCGTC
1	tp5_NaCl-2_e2	CAAGCAGAAGACGGCATACGAGATGAATGATCGTCTCGTGGGCTCGG	AATGATACGGCGACCACCGAGATCTACACGAGAGATTTCGTCGGCAGCGTC
1	tp5_NaCl-2_e4	CAAGCAGAAGACGGCATACGAGATCGATCGGTGTCTCGTGGGCTCGG	AATGATACGGCGACCACCGAGATCTACACGAGAGATTTCGTCGGCAGCGTC
1	tp5_NaCl-2_e6	CAAGCAGAAGACGGCATACGAGATAATAACGGGTCTCGTGGGCTCGG	AATGATACGGCGACCACCGAGATCTACACGAGAGATTTCGTCGGCAGCGTC
1	tp5_NaCl-2_e8	CAAGCAGAAGACGGCATACGAGATTAGAAGAAGTCTCGTGGGCTCGG	AATGATACGGCGACCACCGAGATCTACACGAGAGATTTCGTCGGCAGCGTC
1	tp5_NaCl-2_e10	CAAGCAGAAGACGGCATACGAGATGTCAGGTAGTCTCGTGGGCTCGG	AATGATACGGCGACCACCGAGATCTACACGAGAGATTTCGTCGGCAGCGTC
1	tp5_RT-1_e0	CAAGCAGAAGACGGCATACGAGATGCGGTCCTGTCTCGTGGGCTCGG	AATGATACGGCGACCACCGAGATCTACACGAGAGATTTCGTCGGCAGCGTC
1	tp5_RT-1_e2	CAAGCAGAAGACGGCATACGAGATAATCGGACGTCTCGTGGGCTCGG	AATGATACGGCGACCACCGAGATCTACACGAGAGATTTCGTCGGCAGCGTC
1	tp5_RT-1_e4	CAAGCAGAAGACGGCATACGAGATAACTCGTGGTCTCGTGGGCTCGG	AATGATACGGCGACCACCGAGATCTACACGAGAGATTTCGTCGGCAGCGTC
1	tp5_RT-1_e6	CAAGCAGAAGACGGCATACGAGATGGCCGTGGGTCTCGTGGGCTCGG	AATGATACGGCGACCACCGAGATCTACACGAGAGATTTCGTCGGCAGCGTC
1	tp5_RT-1_e8	CAAGCAGAAGACGGCATACGAGATTTACATGTGTCTCGTGGGCTCGG	AATGATACGGCGACCACCGAGATCTACACGAGAGATTTCGTCGGCAGCGTC
1	tp5_RT-1_e10	CAAGCAGAAGACGGCATACGAGATAGTTAACAGTCTCGTGGGCTCGG	AATGATACGGCGACCACCGAGATCTACACGAGAGATTTCGTCGGCAGCGTC
1	tp5_RT-2_e0	CAAGCAGAAGACGGCATACGAGATATTACAATGTCTCGTGGGCTCGG	AATGATACGGCGACCACCGAGATCTACACCGCGGTTATCGTCGGCAGCGTC
1	tp5_RT-2_e2	CAAGCAGAAGACGGCATACGAGATGAATGATCGTCTCGTGGGCTCGG	AATGATACGGCGACCACCGAGATCTACACCGCGGTTATCGTCGGCAGCGTC
1	tp5_RT-2_e4	CAAGCAGAAGACGGCATACGAGATCGATCGGTGTCTCGTGGGCTCGG	AATGATACGGCGACCACCGAGATCTACACCGCGGTTATCGTCGGCAGCGTC
1	tp5_RT-2_e6	CAAGCAGAAGACGGCATACGAGATAATAACGGGTCTCGTGGGCTCGG	AATGATACGGCGACCACCGAGATCTACACCGCGGTTATCGTCGGCAGCGTC
1	tp5_RT-2_e8	CAAGCAGAAGACGGCATACGAGATTAGAAGAAGTCTCGTGGGCTCGG	AATGATACGGCGACCACCGAGATCTACACCGCGGTTATCGTCGGCAGCGTC
1	tp5_RT-2_e10	CAAGCAGAAGACGGCATACGAGATGTCAGGTAGTCTCGTGGGCTCGG	AATGATACGGCGACCACCGAGATCTACACCGCGGTTATCGTCGGCAGCGTC
2	tp0_na-na_e0	CAAGCAGAAGACGGCATACGAGATTCGCCTTAGTCTCGTGGGCTCGG	AATGATACGGCGACCACCGAGATCTACACTAGATCGCTCGTCGGCAGCGTC
2	tp0_na-na_e2	CAAGCAGAAGACGGCATACGAGATCTAGTACGGTCTCGTGGGCTCGG	AATGATACGGCGACCACCGAGATCTACACTAGATCGCTCGTCGGCAGCGTC
2	tp0_na-na_e4	CAAGCAGAAGACGGCATACGAGATTTCTGCCTGTCTCGTGGGCTCGG	AATGATACGGCGACCACCGAGATCTACACTAGATCGCTCGTCGGCAGCGTC
2	tp0_na-na_e6	CAAGCAGAAGACGGCATACGAGATGCTCAGGAGTCTCGTGGGCTCGG	AATGATACGGCGACCACCGAGATCTACACTAGATCGCTCGTCGGCAGCGTC
2	tp0_na-na_e8	CAAGCAGAAGACGGCATACGAGATAGGAGTCCGTCTCGTGGGCTCGG	AATGATACGGCGACCACCGAGATCTACACTAGATCGCTCGTCGGCAGCGTC
2	tp0_na-na_e10	CAAGCAGAAGACGGCATACGAGATCATGCCTAGTCTCGTGGGCTCGG	AATGATACGGCGACCACCGAGATCTACACTAGATCGCTCGTCGGCAGCGTC
2	tp1_30-1_e0	CAAGCAGAAGACGGCATACGAGATGTAGAGAGGTCTCGTGGGCTCGG	AATGATACGGCGACCACCGAGATCTACACTAGATCGCTCGTCGGCAGCGTC
2	tp1_30-1_e2	CAAGCAGAAGACGGCATACGAGATCCTCTCTGGTCTCGTGGGCTCGG	AATGATACGGCGACCACCGAGATCTACACTAGATCGCTCGTCGGCAGCGTC
2	tp1_30-1_e4	CAAGCAGAAGACGGCATACGAGATAGCGTAGCGTCTCGTGGGCTCGG	AATGATACGGCGACCACCGAGATCTACACTAGATCGCTCGTCGGCAGCGTC
2	tp1_30-1_e6	CAAGCAGAAGACGGCATACGAGATCAGCCTCGGTCTCGTGGGCTCGG	AATGATACGGCGACCACCGAGATCTACACTAGATCGCTCGTCGGCAGCGTC
2	tp1_30-1_e8	CAAGCAGAAGACGGCATACGAGATTGCCTCTTGTCTCGTGGGCTCGG	AATGATACGGCGACCACCGAGATCTACACTAGATCGCTCGTCGGCAGCGTC
2	tp1_30-1_e10	CAAGCAGAAGACGGCATACGAGATTCCTCTACGTCTCGTGGGCTCGG	AATGATACGGCGACCACCGAGATCTACACTAGATCGCTCGTCGGCAGCGTC
2	tp1_30-2_e0	CAAGCAGAAGACGGCATACGAGATTCGCCTTAGTCTCGTGGGCTCGG	AATGATACGGCGACCACCGAGATCTACACCTCTCTATTCGTCGGCAGCGTC
2	tp1_30-2_e2	CAAGCAGAAGACGGCATACGAGATCTAGTACGGTCTCGTGGGCTCGG	AATGATACGGCGACCACCGAGATCTACACCTCTCTATTCGTCGGCAGCGTC
2	tp1_30-2_e4	CAAGCAGAAGACGGCATACGAGATTTCTGCCTGTCTCGTGGGCTCGG	AATGATACGGCGACCACCGAGATCTACACCTCTCTATTCGTCGGCAGCGTC
2	tp1_30-2_e6	CAAGCAGAAGACGGCATACGAGATGCTCAGGAGTCTCGTGGGCTCGG	AATGATACGGCGACCACCGAGATCTACACCTCTCTATTCGTCGGCAGCGTC
2	tp1_30-2_e8	CAAGCAGAAGACGGCATACGAGATAGGAGTCCGTCTCGTGGGCTCGG	AATGATACGGCGACCACCGAGATCTACACCTCTCTATTCGTCGGCAGCGTC
2	tp1_30-2_e10	CAAGCAGAAGACGGCATACGAGATCATGCCTAGTCTCGTGGGCTCGG	AATGATACGGCGACCACCGAGATCTACACCTCTCTATTCGTCGGCAGCGTC
2	tp1_37-1_e0	CAAGCAGAAGACGGCATACGAGATGTAGAGAGGTCTCGTGGGCTCGG	AATGATACGGCGACCACCGAGATCTACACCTCTCTATTCGTCGGCAGCGTC
2	tp1_37-1_e2	CAAGCAGAAGACGGCATACGAGATCCTCTCTGGTCTCGTGGGCTCGG	AATGATACGGCGACCACCGAGATCTACACCTCTCTATTCGTCGGCAGCGTC
2	tp1_37-1_e4	CAAGCAGAAGACGGCATACGAGATAGCGTAGCGTCTCGTGGGCTCGG	AATGATACGGCGACCACCGAGATCTACACCTCTCTATTCGTCGGCAGCGTC
2	tp1_37-1_e6	CAAGCAGAAGACGGCATACGAGATCAGCCTCGGTCTCGTGGGCTCGG	AATGATACGGCGACCACCGAGATCTACACCTCTCTATTCGTCGGCAGCGTC
2	tp1_37-1_e8	CAAGCAGAAGACGGCATACGAGATTGCCTCTTGTCTCGTGGGCTCGG	AATGATACGGCGACCACCGAGATCTACACCTCTCTATTCGTCGGCAGCGTC
2	tp1_37-1_e10	CAAGCAGAAGACGGCATACGAGATTCCTCTACGTCTCGTGGGCTCGG	AATGATACGGCGACCACCGAGATCTACACCTCTCTATTCGTCGGCAGCGTC
2	tp1_37-2_e0	CAAGCAGAAGACGGCATACGAGATTCGCCTTAGTCTCGTGGGCTCGG	AATGATACGGCGACCACCGAGATCTACACTATCCTCTTCGTCGGCAGCGTC
2	tp1_37-2_e2	CAAGCAGAAGACGGCATACGAGATCTAGTACGGTCTCGTGGGCTCGG	AATGATACGGCGACCACCGAGATCTACACTATCCTCTTCGTCGGCAGCGTC
2	tp1_37-2_e4	CAAGCAGAAGACGGCATACGAGATTTCTGCCTGTCTCGTGGGCTCGG	AATGATACGGCGACCACCGAGATCTACACTATCCTCTTCGTCGGCAGCGTC
2	tp1_37-2_e6	CAAGCAGAAGACGGCATACGAGATGCTCAGGAGTCTCGTGGGCTCGG	AATGATACGGCGACCACCGAGATCTACACTATCCTCTTCGTCGGCAGCGTC
2	tp1_37-2_e8	CAAGCAGAAGACGGCATACGAGATAGGAGTCCGTCTCGTGGGCTCGG	AATGATACGGCGACCACCGAGATCTACACTATCCTCTTCGTCGGCAGCGTC
2	tp1_37-2_e10	CAAGCAGAAGACGGCATACGAGATCATGCCTAGTCTCGTGGGCTCGG	AATGATACGGCGACCACCGAGATCTACACTATCCTCTTCGTCGGCAGCGTC
2	tp1_AA-1_e0	CAAGCAGAAGACGGCATACGAGATGTAGAGAGGTCTCGTGGGCTCGG	AATGATACGGCGACCACCGAGATCTACACTATCCTCTTCGTCGGCAGCGTC
2	tp1_AA-1_e2	CAAGCAGAAGACGGCATACGAGATCCTCTCTGGTCTCGTGGGCTCGG	AATGATACGGCGACCACCGAGATCTACACTATCCTCTTCGTCGGCAGCGTC
2	tp1_AA-1_e4	CAAGCAGAAGACGGCATACGAGATAGCGTAGCGTCTCGTGGGCTCGG	AATGATACGGCGACCACCGAGATCTACACTATCCTCTTCGTCGGCAGCGTC
2	tp1_AA-1_e6	CAAGCAGAAGACGGCATACGAGATCAGCCTCGGTCTCGTGGGCTCGG	AATGATACGGCGACCACCGAGATCTACACTATCCTCTTCGTCGGCAGCGTC
2	tp1_AA-1_e8	CAAGCAGAAGACGGCATACGAGATTGCCTCTTGTCTCGTGGGCTCGG	AATGATACGGCGACCACCGAGATCTACACTATCCTCTTCGTCGGCAGCGTC
2	tp1_AA-1_e10	CAAGCAGAAGACGGCATACGAGATTCCTCTACGTCTCGTGGGCTCGG	AATGATACGGCGACCACCGAGATCTACACTATCCTCTTCGTCGGCAGCGTC
2	tp1_AA-2_e0	CAAGCAGAAGACGGCATACGAGATTCGCCTTAGTCTCGTGGGCTCGG	AATGATACGGCGACCACCGAGATCTACACAGAGTAGATCGTCGGCAGCGTC
2	tp1_AA-2_e2	CAAGCAGAAGACGGCATACGAGATCTAGTACGGTCTCGTGGGCTCGG	AATGATACGGCGACCACCGAGATCTACACAGAGTAGATCGTCGGCAGCGTC
2	tp1_AA-2_e4	CAAGCAGAAGACGGCATACGAGATTTCTGCCTGTCTCGTGGGCTCGG	AATGATACGGCGACCACCGAGATCTACACAGAGTAGATCGTCGGCAGCGTC
2	tp1_AA-2_e6	CAAGCAGAAGACGGCATACGAGATGCTCAGGAGTCTCGTGGGCTCGG	AATGATACGGCGACCACCGAGATCTACACAGAGTAGATCGTCGGCAGCGTC
2	tp1_AA-2_e8	CAAGCAGAAGACGGCATACGAGATAGGAGTCCGTCTCGTGGGCTCGG	AATGATACGGCGACCACCGAGATCTACACAGAGTAGATCGTCGGCAGCGTC
2	tp1_AA-2_e10	CAAGCAGAAGACGGCATACGAGATCATGCCTAGTCTCGTGGGCTCGG	AATGATACGGCGACCACCGAGATCTACACAGAGTAGATCGTCGGCAGCGTC
2	tp1_NaCl-1_e0	CAAGCAGAAGACGGCATACGAGATGTAGAGAGGTCTCGTGGGCTCGG	AATGATACGGCGACCACCGAGATCTACACAGAGTAGATCGTCGGCAGCGTC
2	tp1_NaCl-1_e2	CAAGCAGAAGACGGCATACGAGATCCTCTCTGGTCTCGTGGGCTCGG	AATGATACGGCGACCACCGAGATCTACACAGAGTAGATCGTCGGCAGCGTC
2	tp1_NaCl-1_e4	CAAGCAGAAGACGGCATACGAGATAGCGTAGCGTCTCGTGGGCTCGG	AATGATACGGCGACCACCGAGATCTACACAGAGTAGATCGTCGGCAGCGTC
2	tp1_NaCl-1_e6	CAAGCAGAAGACGGCATACGAGATCAGCCTCGGTCTCGTGGGCTCGG	AATGATACGGCGACCACCGAGATCTACACAGAGTAGATCGTCGGCAGCGTC
2	tp1_NaCl-1_e8	CAAGCAGAAGACGGCATACGAGATTGCCTCTTGTCTCGTGGGCTCGG	AATGATACGGCGACCACCGAGATCTACACAGAGTAGATCGTCGGCAGCGTC
2	tp1_NaCl-1_e10	CAAGCAGAAGACGGCATACGAGATTCCTCTACGTCTCGTGGGCTCGG	AATGATACGGCGACCACCGAGATCTACACAGAGTAGATCGTCGGCAGCGTC
2	tp1_NaCl-2_e0	CAAGCAGAAGACGGCATACGAGATTCGCCTTAGTCTCGTGGGCTCGG	AATGATACGGCGACCACCGAGATCTACACGTAAGGAGTCGTCGGCAGCGTC
2	tp1_NaCl-2_e2	CAAGCAGAAGACGGCATACGAGATCTAGTACGGTCTCGTGGGCTCGG	AATGATACGGCGACCACCGAGATCTACACGTAAGGAGTCGTCGGCAGCGTC
2	tp1_NaCl-2_e4	CAAGCAGAAGACGGCATACGAGATTTCTGCCTGTCTCGTGGGCTCGG	AATGATACGGCGACCACCGAGATCTACACGTAAGGAGTCGTCGGCAGCGTC
2	tp1_NaCl-2_e6	CAAGCAGAAGACGGCATACGAGATGCTCAGGAGTCTCGTGGGCTCGG	AATGATACGGCGACCACCGAGATCTACACGTAAGGAGTCGTCGGCAGCGTC
2	tp1_NaCl-2_e8	CAAGCAGAAGACGGCATACGAGATAGGAGTCCGTCTCGTGGGCTCGG	AATGATACGGCGACCACCGAGATCTACACGTAAGGAGTCGTCGGCAGCGTC
2	tp1_NaCl-2_e10	CAAGCAGAAGACGGCATACGAGATCATGCCTAGTCTCGTGGGCTCGG	AATGATACGGCGACCACCGAGATCTACACGTAAGGAGTCGTCGGCAGCGTC
2	tp1_RT-1_e0	CAAGCAGAAGACGGCATACGAGATGTAGAGAGGTCTCGTGGGCTCGG	AATGATACGGCGACCACCGAGATCTACACGTAAGGAGTCGTCGGCAGCGTC
2	tp1_RT-1_e2	CAAGCAGAAGACGGCATACGAGATCCTCTCTGGTCTCGTGGGCTCGG	AATGATACGGCGACCACCGAGATCTACACGTAAGGAGTCGTCGGCAGCGTC
2	tp1_RT-1_e4	CAAGCAGAAGACGGCATACGAGATAGCGTAGCGTCTCGTGGGCTCGG	AATGATACGGCGACCACCGAGATCTACACGTAAGGAGTCGTCGGCAGCGTC
2	tp1_RT-1_e6	CAAGCAGAAGACGGCATACGAGATCAGCCTCGGTCTCGTGGGCTCGG	AATGATACGGCGACCACCGAGATCTACACGTAAGGAGTCGTCGGCAGCGTC
2	tp1_RT-1_e8	CAAGCAGAAGACGGCATACGAGATTGCCTCTTGTCTCGTGGGCTCGG	AATGATACGGCGACCACCGAGATCTACACGTAAGGAGTCGTCGGCAGCGTC
2	tp1_RT-1_e10	CAAGCAGAAGACGGCATACGAGATTCCTCTACGTCTCGTGGGCTCGG	AATGATACGGCGACCACCGAGATCTACACGTAAGGAGTCGTCGGCAGCGTC
2	tp1_RT-2_e0	CAAGCAGAAGACGGCATACGAGATTCGCCTTAGTCTCGTGGGCTCGG	AATGATACGGCGACCACCGAGATCTACACACTGCATATCGTCGGCAGCGTC
2	tp1_RT-2_e2	CAAGCAGAAGACGGCATACGAGATCTAGTACGGTCTCGTGGGCTCGG	AATGATACGGCGACCACCGAGATCTACACACTGCATATCGTCGGCAGCGTC
2	tp1_RT-2_e4	CAAGCAGAAGACGGCATACGAGATTTCTGCCTGTCTCGTGGGCTCGG	AATGATACGGCGACCACCGAGATCTACACACTGCATATCGTCGGCAGCGTC
2	tp1_RT-2_e6	CAAGCAGAAGACGGCATACGAGATGCTCAGGAGTCTCGTGGGCTCGG	AATGATACGGCGACCACCGAGATCTACACACTGCATATCGTCGGCAGCGTC
2	tp1_RT-2_e8	CAAGCAGAAGACGGCATACGAGATAGGAGTCCGTCTCGTGGGCTCGG	AATGATACGGCGACCACCGAGATCTACACACTGCATATCGTCGGCAGCGTC
2	tp1_RT-2_e10	CAAGCAGAAGACGGCATACGAGATCATGCCTAGTCTCGTGGGCTCGG	AATGATACGGCGACCACCGAGATCTACACACTGCATATCGTCGGCAGCGTC
2	tp3_30-1_e0	CAAGCAGAAGACGGCATACGAGATGTAGAGAGGTCTCGTGGGCTCGG	AATGATACGGCGACCACCGAGATCTACACACTGCATATCGTCGGCAGCGTC
2	tp3_30-1_e2	CAAGCAGAAGACGGCATACGAGATCCTCTCTGGTCTCGTGGGCTCGG	AATGATACGGCGACCACCGAGATCTACACACTGCATATCGTCGGCAGCGTC
2	tp3_30-1_e4	CAAGCAGAAGACGGCATACGAGATAGCGTAGCGTCTCGTGGGCTCGG	AATGATACGGCGACCACCGAGATCTACACACTGCATATCGTCGGCAGCGTC
2	tp3_30-1_e6	CAAGCAGAAGACGGCATACGAGATCAGCCTCGGTCTCGTGGGCTCGG	AATGATACGGCGACCACCGAGATCTACACACTGCATATCGTCGGCAGCGTC
2	tp3_30-1_e8	CAAGCAGAAGACGGCATACGAGATTGCCTCTTGTCTCGTGGGCTCGG	AATGATACGGCGACCACCGAGATCTACACACTGCATATCGTCGGCAGCGTC
2	tp3_30-1_e10	CAAGCAGAAGACGGCATACGAGATTCCTCTACGTCTCGTGGGCTCGG	AATGATACGGCGACCACCGAGATCTACACACTGCATATCGTCGGCAGCGTC
2	tp3_30-2_e0	CAAGCAGAAGACGGCATACGAGATTCGCCTTAGTCTCGTGGGCTCGG	AATGATACGGCGACCACCGAGATCTACACAAGGAGTATCGTCGGCAGCGTC
2	tp3_30-2_e2	CAAGCAGAAGACGGCATACGAGATCTAGTACGGTCTCGTGGGCTCGG	AATGATACGGCGACCACCGAGATCTACACAAGGAGTATCGTCGGCAGCGTC
2	tp3_30-2_e4	CAAGCAGAAGACGGCATACGAGATTTCTGCCTGTCTCGTGGGCTCGG	AATGATACGGCGACCACCGAGATCTACACAAGGAGTATCGTCGGCAGCGTC
2	tp3_30-2_e6	CAAGCAGAAGACGGCATACGAGATGCTCAGGAGTCTCGTGGGCTCGG	AATGATACGGCGACCACCGAGATCTACACAAGGAGTATCGTCGGCAGCGTC
2	tp3_30-2_e8	CAAGCAGAAGACGGCATACGAGATAGGAGTCCGTCTCGTGGGCTCGG	AATGATACGGCGACCACCGAGATCTACACAAGGAGTATCGTCGGCAGCGTC
2	tp3_30-2_e10	CAAGCAGAAGACGGCATACGAGATCATGCCTAGTCTCGTGGGCTCGG	AATGATACGGCGACCACCGAGATCTACACAAGGAGTATCGTCGGCAGCGTC
2	tp3_37-1_e0	CAAGCAGAAGACGGCATACGAGATGTAGAGAGGTCTCGTGGGCTCGG	AATGATACGGCGACCACCGAGATCTACACAAGGAGTATCGTCGGCAGCGTC
2	tp3_37-1_e2	CAAGCAGAAGACGGCATACGAGATCCTCTCTGGTCTCGTGGGCTCGG	AATGATACGGCGACCACCGAGATCTACACAAGGAGTATCGTCGGCAGCGTC
2	tp3_37-1_e4	CAAGCAGAAGACGGCATACGAGATAGCGTAGCGTCTCGTGGGCTCGG	AATGATACGGCGACCACCGAGATCTACACAAGGAGTATCGTCGGCAGCGTC
2	tp3_37-1_e6	CAAGCAGAAGACGGCATACGAGATCAGCCTCGGTCTCGTGGGCTCGG	AATGATACGGCGACCACCGAGATCTACACAAGGAGTATCGTCGGCAGCGTC
2	tp3_37-1_e8	CAAGCAGAAGACGGCATACGAGATTGCCTCTTGTCTCGTGGGCTCGG	AATGATACGGCGACCACCGAGATCTACACAAGGAGTATCGTCGGCAGCGTC
2	tp3_37-1_e10	CAAGCAGAAGACGGCATACGAGATTCCTCTACGTCTCGTGGGCTCGG	AATGATACGGCGACCACCGAGATCTACACAAGGAGTATCGTCGGCAGCGTC
2	tp3_37-2_e0	CAAGCAGAAGACGGCATACGAGATTCGCCTTAGTCTCGTGGGCTCGG	AATGATACGGCGACCACCGAGATCTACACCTAAGCCTTCGTCGGCAGCGTC
2	tp3_37-2_e2	CAAGCAGAAGACGGCATACGAGATCTAGTACGGTCTCGTGGGCTCGG	AATGATACGGCGACCACCGAGATCTACACCTAAGCCTTCGTCGGCAGCGTC
2	tp3_37-2_e4	CAAGCAGAAGACGGCATACGAGATTTCTGCCTGTCTCGTGGGCTCGG	AATGATACGGCGACCACCGAGATCTACACCTAAGCCTTCGTCGGCAGCGTC
2	tp3_37-2_e6	CAAGCAGAAGACGGCATACGAGATGCTCAGGAGTCTCGTGGGCTCGG	AATGATACGGCGACCACCGAGATCTACACCTAAGCCTTCGTCGGCAGCGTC
2	tp3_37-2_e8	CAAGCAGAAGACGGCATACGAGATAGGAGTCCGTCTCGTGGGCTCGG	AATGATACGGCGACCACCGAGATCTACACCTAAGCCTTCGTCGGCAGCGTC
2	tp3_37-2_e10	CAAGCAGAAGACGGCATACGAGATCATGCCTAGTCTCGTGGGCTCGG	AATGATACGGCGACCACCGAGATCTACACCTAAGCCTTCGTCGGCAGCGTC
2	tp3_AA-1_e0	CAAGCAGAAGACGGCATACGAGATGTAGAGAGGTCTCGTGGGCTCGG	AATGATACGGCGACCACCGAGATCTACACCTAAGCCTTCGTCGGCAGCGTC
2	tp3_AA-1_e2	CAAGCAGAAGACGGCATACGAGATCCTCTCTGGTCTCGTGGGCTCGG	AATGATACGGCGACCACCGAGATCTACACCTAAGCCTTCGTCGGCAGCGTC
2	tp3_AA-1_e4	CAAGCAGAAGACGGCATACGAGATAGCGTAGCGTCTCGTGGGCTCGG	AATGATACGGCGACCACCGAGATCTACACCTAAGCCTTCGTCGGCAGCGTC
2	tp3_AA-1_e6	CAAGCAGAAGACGGCATACGAGATCAGCCTCGGTCTCGTGGGCTCGG	AATGATACGGCGACCACCGAGATCTACACCTAAGCCTTCGTCGGCAGCGTC
2	tp3_AA-1_e8	CAAGCAGAAGACGGCATACGAGATTGCCTCTTGTCTCGTGGGCTCGG	AATGATACGGCGACCACCGAGATCTACACCTAAGCCTTCGTCGGCAGCGTC
2	tp3_AA-1_e10	CAAGCAGAAGACGGCATACGAGATTCCTCTACGTCTCGTGGGCTCGG	AATGATACGGCGACCACCGAGATCTACACCTAAGCCTTCGTCGGCAGCGTC
2	tp3_AA-2_e0	CAAGCAGAAGACGGCATACGAGATATTACAATGTCTCGTGGGCTCGG	AATGATACGGCGACCACCGAGATCTACACGGCTACTCTCGTCGGCAGCGTC
2	tp3_AA-2_e2	CAAGCAGAAGACGGCATACGAGATGAATGATCGTCTCGTGGGCTCGG	AATGATACGGCGACCACCGAGATCTACACGGCTACTCTCGTCGGCAGCGTC
2	tp3_AA-2_e4	CAAGCAGAAGACGGCATACGAGATCGATCGGTGTCTCGTGGGCTCGG	AATGATACGGCGACCACCGAGATCTACACGGCTACTCTCGTCGGCAGCGTC
2	tp3_AA-2_e6	CAAGCAGAAGACGGCATACGAGATAATAACGGGTCTCGTGGGCTCGG	AATGATACGGCGACCACCGAGATCTACACGGCTACTCTCGTCGGCAGCGTC
2	tp3_AA-2_e8	CAAGCAGAAGACGGCATACGAGATTAGAAGAAGTCTCGTGGGCTCGG	AATGATACGGCGACCACCGAGATCTACACGGCTACTCTCGTCGGCAGCGTC
2	tp3_AA-2_e10	CAAGCAGAAGACGGCATACGAGATGTCAGGTAGTCTCGTGGGCTCGG	AATGATACGGCGACCACCGAGATCTACACGGCTACTCTCGTCGGCAGCGTC
2	tp3_NaCl-1_e0	CAAGCAGAAGACGGCATACGAGATGCGGTCCTGTCTCGTGGGCTCGG	AATGATACGGCGACCACCGAGATCTACACGGCTACTCTCGTCGGCAGCGTC
2	tp3_NaCl-1_e2	CAAGCAGAAGACGGCATACGAGATAATCGGACGTCTCGTGGGCTCGG	AATGATACGGCGACCACCGAGATCTACACGGCTACTCTCGTCGGCAGCGTC
2	tp3_NaCl-1_e4	CAAGCAGAAGACGGCATACGAGATAACTCGTGGTCTCGTGGGCTCGG	AATGATACGGCGACCACCGAGATCTACACGGCTACTCTCGTCGGCAGCGTC
2	tp3_NaCl-1_e6	CAAGCAGAAGACGGCATACGAGATGGCCGTGGGTCTCGTGGGCTCGG	AATGATACGGCGACCACCGAGATCTACACGGCTACTCTCGTCGGCAGCGTC
2	tp3_NaCl-1_e8	CAAGCAGAAGACGGCATACGAGATTTACATGTGTCTCGTGGGCTCGG	AATGATACGGCGACCACCGAGATCTACACGGCTACTCTCGTCGGCAGCGTC
2	tp3_NaCl-1_e10	CAAGCAGAAGACGGCATACGAGATAGTTAACAGTCTCGTGGGCTCGG	AATGATACGGCGACCACCGAGATCTACACGGCTACTCTCGTCGGCAGCGTC
2	tp3_NaCl-2_e0	CAAGCAGAAGACGGCATACGAGATATTACAATGTCTCGTGGGCTCGG	AATGATACGGCGACCACCGAGATCTACACCCTCAGACTCGTCGGCAGCGTC
2	tp3_NaCl-2_e2	CAAGCAGAAGACGGCATACGAGATGAATGATCGTCTCGTGGGCTCGG	AATGATACGGCGACCACCGAGATCTACACCCTCAGACTCGTCGGCAGCGTC
2	tp3_NaCl-2_e4	CAAGCAGAAGACGGCATACGAGATCGATCGGTGTCTCGTGGGCTCGG	AATGATACGGCGACCACCGAGATCTACACCCTCAGACTCGTCGGCAGCGTC
2	tp3_NaCl-2_e6	CAAGCAGAAGACGGCATACGAGATAATAACGGGTCTCGTGGGCTCGG	AATGATACGGCGACCACCGAGATCTACACCCTCAGACTCGTCGGCAGCGTC
2	tp3_NaCl-2_e8	CAAGCAGAAGACGGCATACGAGATTAGAAGAAGTCTCGTGGGCTCGG	AATGATACGGCGACCACCGAGATCTACACCCTCAGACTCGTCGGCAGCGTC
2	tp3_NaCl-2_e10	CAAGCAGAAGACGGCATACGAGATGTCAGGTAGTCTCGTGGGCTCGG	AATGATACGGCGACCACCGAGATCTACACCCTCAGACTCGTCGGCAGCGTC
2	tp3_RT-1_e0	CAAGCAGAAGACGGCATACGAGATGCGGTCCTGTCTCGTGGGCTCGG	AATGATACGGCGACCACCGAGATCTACACCCTCAGACTCGTCGGCAGCGTC
2	tp3_RT-1_e2	CAAGCAGAAGACGGCATACGAGATAATCGGACGTCTCGTGGGCTCGG	AATGATACGGCGACCACCGAGATCTACACCCTCAGACTCGTCGGCAGCGTC
2	tp3_RT-1_e4	CAAGCAGAAGACGGCATACGAGATAACTCGTGGTCTCGTGGGCTCGG	AATGATACGGCGACCACCGAGATCTACACCCTCAGACTCGTCGGCAGCGTC
2	tp3_RT-1_e6	CAAGCAGAAGACGGCATACGAGATGGCCGTGGGTCTCGTGGGCTCGG	AATGATACGGCGACCACCGAGATCTACACCCTCAGACTCGTCGGCAGCGTC
2	tp3_RT-1_e8	CAAGCAGAAGACGGCATACGAGATTTACATGTGTCTCGTGGGCTCGG	AATGATACGGCGACCACCGAGATCTACACCCTCAGACTCGTCGGCAGCGTC
2	tp3_RT-1_e10	CAAGCAGAAGACGGCATACGAGATAGTTAACAGTCTCGTGGGCTCGG	AATGATACGGCGACCACCGAGATCTACACCCTCAGACTCGTCGGCAGCGTC
2	tp3_RT-2_e0	CAAGCAGAAGACGGCATACGAGATATTACAATGTCTCGTGGGCTCGG	AATGATACGGCGACCACCGAGATCTACACTCCTTACGTCGTCGGCAGCGTC
2	tp3_RT-2_e2	CAAGCAGAAGACGGCATACGAGATGAATGATCGTCTCGTGGGCTCGG	AATGATACGGCGACCACCGAGATCTACACTCCTTACGTCGTCGGCAGCGTC
2	tp3_RT-2_e4	CAAGCAGAAGACGGCATACGAGATCGATCGGTGTCTCGTGGGCTCGG	AATGATACGGCGACCACCGAGATCTACACTCCTTACGTCGTCGGCAGCGTC
2	tp3_RT-2_e6	CAAGCAGAAGACGGCATACGAGATAATAACGGGTCTCGTGGGCTCGG	AATGATACGGCGACCACCGAGATCTACACTCCTTACGTCGTCGGCAGCGTC
2	tp3_RT-2_e8	CAAGCAGAAGACGGCATACGAGATTAGAAGAAGTCTCGTGGGCTCGG	AATGATACGGCGACCACCGAGATCTACACTCCTTACGTCGTCGGCAGCGTC
2	tp3_RT-2_e10	CAAGCAGAAGACGGCATACGAGATGTCAGGTAGTCTCGTGGGCTCGG	AATGATACGGCGACCACCGAGATCTACACTCCTTACGTCGTCGGCAGCGTC
2	tp5_30-1_e0	CAAGCAGAAGACGGCATACGAGATGCGGTCCTGTCTCGTGGGCTCGG	AATGATACGGCGACCACCGAGATCTACACTCCTTACGTCGTCGGCAGCGTC
2	tp5_30-1_e2	CAAGCAGAAGACGGCATACGAGATAATCGGACGTCTCGTGGGCTCGG	AATGATACGGCGACCACCGAGATCTACACTCCTTACGTCGTCGGCAGCGTC
2	tp5_30-1_e4	CAAGCAGAAGACGGCATACGAGATAACTCGTGGTCTCGTGGGCTCGG	AATGATACGGCGACCACCGAGATCTACACTCCTTACGTCGTCGGCAGCGTC
2	tp5_30-1_e6	CAAGCAGAAGACGGCATACGAGATGGCCGTGGGTCTCGTGGGCTCGG	AATGATACGGCGACCACCGAGATCTACACTCCTTACGTCGTCGGCAGCGTC
2	tp5_30-1_e8	CAAGCAGAAGACGGCATACGAGATTTACATGTGTCTCGTGGGCTCGG	AATGATACGGCGACCACCGAGATCTACACTCCTTACGTCGTCGGCAGCGTC
2	tp5_30-1_e10	CAAGCAGAAGACGGCATACGAGATAGTTAACAGTCTCGTGGGCTCGG	AATGATACGGCGACCACCGAGATCTACACTCCTTACGTCGTCGGCAGCGTC
2	tp5_30-2_e0	CAAGCAGAAGACGGCATACGAGATATTACAATGTCTCGTGGGCTCGG	AATGATACGGCGACCACCGAGATCTACACACGCGTGGTCGTCGGCAGCGTC
2	tp5_30-2_e2	CAAGCAGAAGACGGCATACGAGATGAATGATCGTCTCGTGGGCTCGG	AATGATACGGCGACCACCGAGATCTACACACGCGTGGTCGTCGGCAGCGTC
2	tp5_30-2_e4	CAAGCAGAAGACGGCATACGAGATCGATCGGTGTCTCGTGGGCTCGG	AATGATACGGCGACCACCGAGATCTACACACGCGTGGTCGTCGGCAGCGTC
2	tp5_30-2_e6	CAAGCAGAAGACGGCATACGAGATAATAACGGGTCTCGTGGGCTCGG	AATGATACGGCGACCACCGAGATCTACACACGCGTGGTCGTCGGCAGCGTC
2	tp5_30-2_e8	CAAGCAGAAGACGGCATACGAGATTAGAAGAAGTCTCGTGGGCTCGG	AATGATACGGCGACCACCGAGATCTACACACGCGTGGTCGTCGGCAGCGTC
2	tp5_30-2_e10	CAAGCAGAAGACGGCATACGAGATGTCAGGTAGTCTCGTGGGCTCGG	AATGATACGGCGACCACCGAGATCTACACACGCGTGGTCGTCGGCAGCGTC
2	tp5_37-1_e0	CAAGCAGAAGACGGCATACGAGATGCGGTCCTGTCTCGTGGGCTCGG	AATGATACGGCGACCACCGAGATCTACACACGCGTGGTCGTCGGCAGCGTC
2	tp5_37-1_e2	CAAGCAGAAGACGGCATACGAGATAATCGGACGTCTCGTGGGCTCGG	AATGATACGGCGACCACCGAGATCTACACACGCGTGGTCGTCGGCAGCGTC
2	tp5_37-1_e4	CAAGCAGAAGACGGCATACGAGATAACTCGTGGTCTCGTGGGCTCGG	AATGATACGGCGACCACCGAGATCTACACACGCGTGGTCGTCGGCAGCGTC
2	tp5_37-1_e6	CAAGCAGAAGACGGCATACGAGATGGCCGTGGGTCTCGTGGGCTCGG	AATGATACGGCGACCACCGAGATCTACACACGCGTGGTCGTCGGCAGCGTC
2	tp5_37-1_e8	CAAGCAGAAGACGGCATACGAGATTTACATGTGTCTCGTGGGCTCGG	AATGATACGGCGACCACCGAGATCTACACACGCGTGGTCGTCGGCAGCGTC
2	tp5_37-1_e10	CAAGCAGAAGACGGCATACGAGATAGTTAACAGTCTCGTGGGCTCGG	AATGATACGGCGACCACCGAGATCTACACACGCGTGGTCGTCGGCAGCGTC
2	tp5_37-2_e0	CAAGCAGAAGACGGCATACGAGATATTACAATGTCTCGTGGGCTCGG	AATGATACGGCGACCACCGAGATCTACACGGAACTCCTCGTCGGCAGCGTC
2	tp5_37-2_e2	CAAGCAGAAGACGGCATACGAGATGAATGATCGTCTCGTGGGCTCGG	AATGATACGGCGACCACCGAGATCTACACGGAACTCCTCGTCGGCAGCGTC
2	tp5_37-2_e4	CAAGCAGAAGACGGCATACGAGATCGATCGGTGTCTCGTGGGCTCGG	AATGATACGGCGACCACCGAGATCTACACGGAACTCCTCGTCGGCAGCGTC
2	tp5_37-2_e6	CAAGCAGAAGACGGCATACGAGATAATAACGGGTCTCGTGGGCTCGG	AATGATACGGCGACCACCGAGATCTACACGGAACTCCTCGTCGGCAGCGTC
2	tp5_37-2_e8	CAAGCAGAAGACGGCATACGAGATTAGAAGAAGTCTCGTGGGCTCGG	AATGATACGGCGACCACCGAGATCTACACGGAACTCCTCGTCGGCAGCGTC
2	tp5_37-2_e10	CAAGCAGAAGACGGCATACGAGATGTCAGGTAGTCTCGTGGGCTCGG	AATGATACGGCGACCACCGAGATCTACACGGAACTCCTCGTCGGCAGCGTC
2	tp5_AA-1_e0	CAAGCAGAAGACGGCATACGAGATGCGGTCCTGTCTCGTGGGCTCGG	AATGATACGGCGACCACCGAGATCTACACGGAACTCCTCGTCGGCAGCGTC
2	tp5_AA-1_e2	CAAGCAGAAGACGGCATACGAGATAATCGGACGTCTCGTGGGCTCGG	AATGATACGGCGACCACCGAGATCTACACGGAACTCCTCGTCGGCAGCGTC
2	tp5_AA-1_e4	CAAGCAGAAGACGGCATACGAGATAACTCGTGGTCTCGTGGGCTCGG	AATGATACGGCGACCACCGAGATCTACACGGAACTCCTCGTCGGCAGCGTC
2	tp5_AA-1_e6	CAAGCAGAAGACGGCATACGAGATGGCCGTGGGTCTCGTGGGCTCGG	AATGATACGGCGACCACCGAGATCTACACGGAACTCCTCGTCGGCAGCGTC
2	tp5_AA-1_e8	CAAGCAGAAGACGGCATACGAGATTTACATGTGTCTCGTGGGCTCGG	AATGATACGGCGACCACCGAGATCTACACGGAACTCCTCGTCGGCAGCGTC
2	tp5_AA-1_e10	CAAGCAGAAGACGGCATACGAGATAGTTAACAGTCTCGTGGGCTCGG	AATGATACGGCGACCACCGAGATCTACACGGAACTCCTCGTCGGCAGCGTC
2	tp5_AA-2_e0	CAAGCAGAAGACGGCATACGAGATATTACAATGTCTCGTGGGCTCGG	AATGATACGGCGACCACCGAGATCTACACTGGCCATGTCGTCGGCAGCGTC
2	tp5_AA-2_e2	CAAGCAGAAGACGGCATACGAGATGAATGATCGTCTCGTGGGCTCGG	AATGATACGGCGACCACCGAGATCTACACTGGCCATGTCGTCGGCAGCGTC
2	tp5_AA-2_e4	CAAGCAGAAGACGGCATACGAGATCGATCGGTGTCTCGTGGGCTCGG	AATGATACGGCGACCACCGAGATCTACACTGGCCATGTCGTCGGCAGCGTC
2	tp5_AA-2_e6	CAAGCAGAAGACGGCATACGAGATAATAACGGGTCTCGTGGGCTCGG	AATGATACGGCGACCACCGAGATCTACACTGGCCATGTCGTCGGCAGCGTC
2	tp5_AA-2_e8	CAAGCAGAAGACGGCATACGAGATTAGAAGAAGTCTCGTGGGCTCGG	AATGATACGGCGACCACCGAGATCTACACTGGCCATGTCGTCGGCAGCGTC
2	tp5_AA-2_e10	CAAGCAGAAGACGGCATACGAGATGTCAGGTAGTCTCGTGGGCTCGG	AATGATACGGCGACCACCGAGATCTACACTGGCCATGTCGTCGGCAGCGTC
2	tp5_NaCl-1_e0	CAAGCAGAAGACGGCATACGAGATGCGGTCCTGTCTCGTGGGCTCGG	AATGATACGGCGACCACCGAGATCTACACTGGCCATGTCGTCGGCAGCGTC
2	tp5_NaCl-1_e2	CAAGCAGAAGACGGCATACGAGATAATCGGACGTCTCGTGGGCTCGG	AATGATACGGCGACCACCGAGATCTACACTGGCCATGTCGTCGGCAGCGTC
2	tp5_NaCl-1_e4	CAAGCAGAAGACGGCATACGAGATAACTCGTGGTCTCGTGGGCTCGG	AATGATACGGCGACCACCGAGATCTACACTGGCCATGTCGTCGGCAGCGTC
2	tp5_NaCl-1_e6	CAAGCAGAAGACGGCATACGAGATGGCCGTGGGTCTCGTGGGCTCGG	AATGATACGGCGACCACCGAGATCTACACTGGCCATGTCGTCGGCAGCGTC
2	tp5_NaCl-1_e8	CAAGCAGAAGACGGCATACGAGATTTACATGTGTCTCGTGGGCTCGG	AATGATACGGCGACCACCGAGATCTACACTGGCCATGTCGTCGGCAGCGTC
2	tp5_NaCl-1_e10	CAAGCAGAAGACGGCATACGAGATAGTTAACAGTCTCGTGGGCTCGG	AATGATACGGCGACCACCGAGATCTACACTGGCCATGTCGTCGGCAGCGTC
2	tp5_NaCl-2_e0	CAAGCAGAAGACGGCATACGAGATATTACAATGTCTCGTGGGCTCGG	AATGATACGGCGACCACCGAGATCTACACGAGAGATTTCGTCGGCAGCGTC
2	tp5_NaCl-2_e2	CAAGCAGAAGACGGCATACGAGATGAATGATCGTCTCGTGGGCTCGG	AATGATACGGCGACCACCGAGATCTACACGAGAGATTTCGTCGGCAGCGTC
2	tp5_NaCl-2_e4	CAAGCAGAAGACGGCATACGAGATCGATCGGTGTCTCGTGGGCTCGG	AATGATACGGCGACCACCGAGATCTACACGAGAGATTTCGTCGGCAGCGTC
2	tp5_NaCl-2_e6	CAAGCAGAAGACGGCATACGAGATAATAACGGGTCTCGTGGGCTCGG	AATGATACGGCGACCACCGAGATCTACACGAGAGATTTCGTCGGCAGCGTC
2	tp5_NaCl-2_e8	CAAGCAGAAGACGGCATACGAGATTAGAAGAAGTCTCGTGGGCTCGG	AATGATACGGCGACCACCGAGATCTACACGAGAGATTTCGTCGGCAGCGTC
2	tp5_NaCl-2_e10	CAAGCAGAAGACGGCATACGAGATGTCAGGTAGTCTCGTGGGCTCGG	AATGATACGGCGACCACCGAGATCTACACGAGAGATTTCGTCGGCAGCGTC
2	tp5_RT-1_e0	CAAGCAGAAGACGGCATACGAGATGCGGTCCTGTCTCGTGGGCTCGG	AATGATACGGCGACCACCGAGATCTACACGAGAGATTTCGTCGGCAGCGTC
2	tp5_RT-1_e2	CAAGCAGAAGACGGCATACGAGATAATCGGACGTCTCGTGGGCTCGG	AATGATACGGCGACCACCGAGATCTACACGAGAGATTTCGTCGGCAGCGTC
2	tp5_RT-1_e4	CAAGCAGAAGACGGCATACGAGATAACTCGTGGTCTCGTGGGCTCGG	AATGATACGGCGACCACCGAGATCTACACGAGAGATTTCGTCGGCAGCGTC
2	tp5_RT-1_e6	CAAGCAGAAGACGGCATACGAGATGGCCGTGGGTCTCGTGGGCTCGG	AATGATACGGCGACCACCGAGATCTACACGAGAGATTTCGTCGGCAGCGTC
2	tp5_RT-1_e8	CAAGCAGAAGACGGCATACGAGATTTACATGTGTCTCGTGGGCTCGG	AATGATACGGCGACCACCGAGATCTACACGAGAGATTTCGTCGGCAGCGTC
2	tp5_RT-1_e10	CAAGCAGAAGACGGCATACGAGATAGTTAACAGTCTCGTGGGCTCGG	AATGATACGGCGACCACCGAGATCTACACGAGAGATTTCGTCGGCAGCGTC
2	tp5_RT-2_e0	CAAGCAGAAGACGGCATACGAGATATTACAATGTCTCGTGGGCTCGG	AATGATACGGCGACCACCGAGATCTACACCGCGGTTATCGTCGGCAGCGTC
2	tp5_RT-2_e2	CAAGCAGAAGACGGCATACGAGATGAATGATCGTCTCGTGGGCTCGG	AATGATACGGCGACCACCGAGATCTACACCGCGGTTATCGTCGGCAGCGTC
2	tp5_RT-2_e4	CAAGCAGAAGACGGCATACGAGATCGATCGGTGTCTCGTGGGCTCGG	AATGATACGGCGACCACCGAGATCTACACCGCGGTTATCGTCGGCAGCGTC
2	tp5_RT-2_e6	CAAGCAGAAGACGGCATACGAGATAATAACGGGTCTCGTGGGCTCGG	AATGATACGGCGACCACCGAGATCTACACCGCGGTTATCGTCGGCAGCGTC
2	tp5_RT-2_e8	CAAGCAGAAGACGGCATACGAGATTAGAAGAAGTCTCGTGGGCTCGG	AATGATACGGCGACCACCGAGATCTACACCGCGGTTATCGTCGGCAGCGTC
2	tp5_RT-2_e10	CAAGCAGAAGACGGCATACGAGATGTCAGGTAGTCTCGTGGGCTCGG	AATGATACGGCGACCACCGAGATCTACACCGCGGTTATCGTCGGCAGCGTC
