# Supplementary figures and images for: Dynamics and variability in the pleiotropic effects of adaptation in laboratory budding yeast populations
Source: eLife journal article supplement (doi:10.7554/elife.70918), 2021-10-01

**Fitness in assay environment**

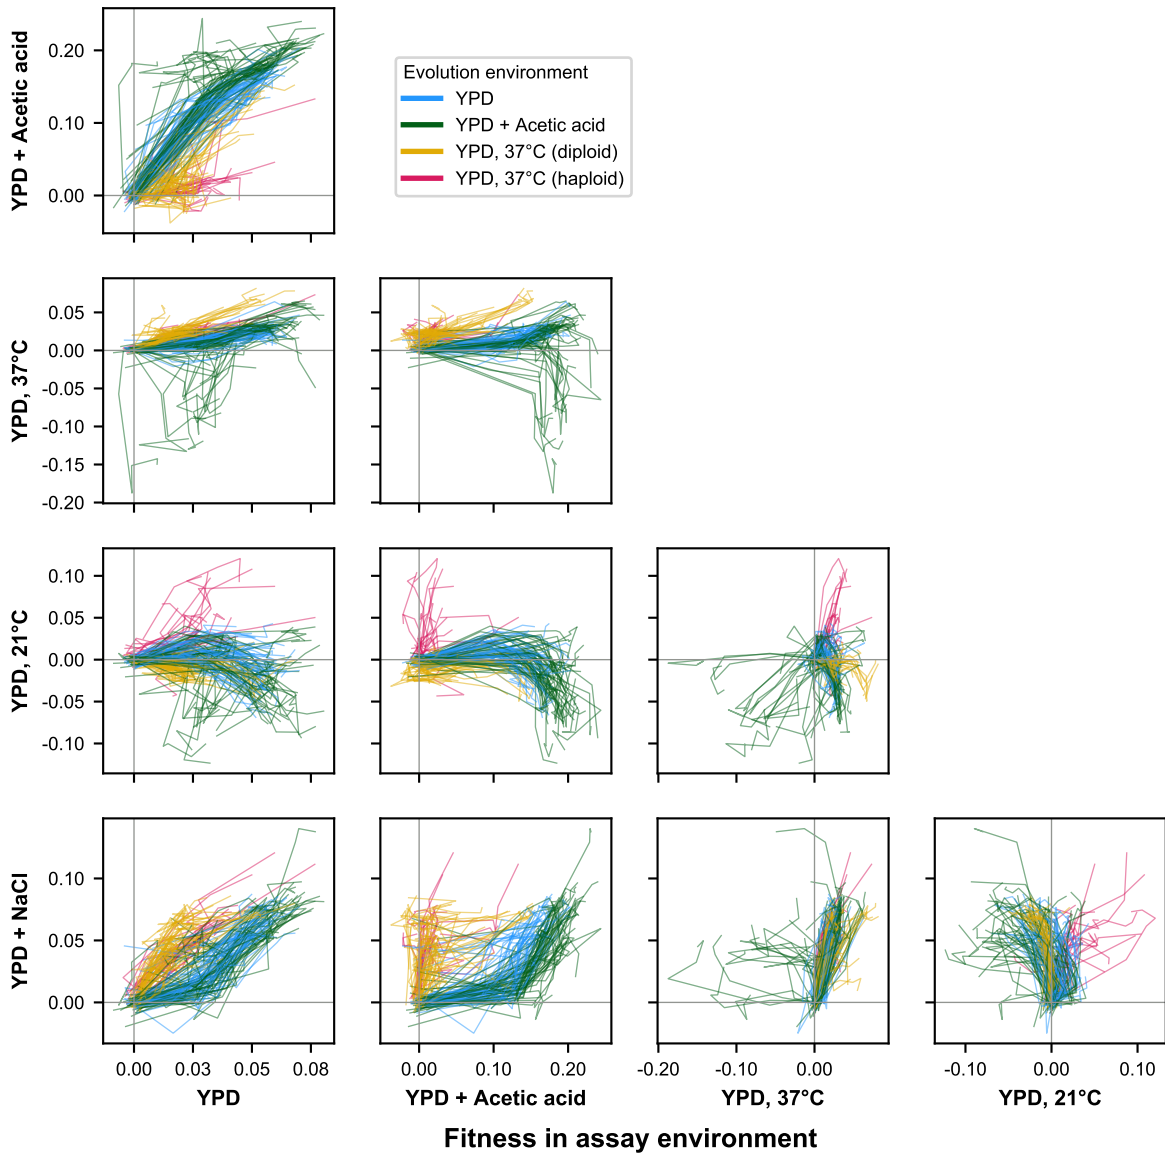

Supplement: supp [file elife-70918-supp-v1.zip]

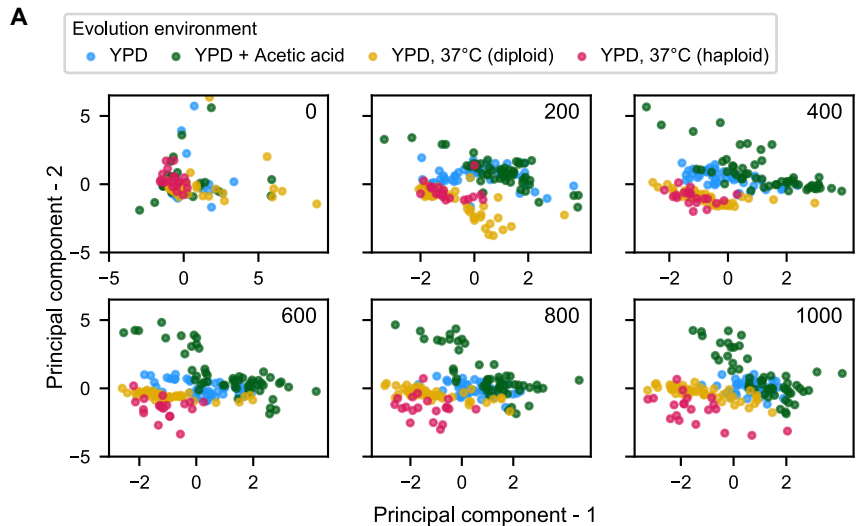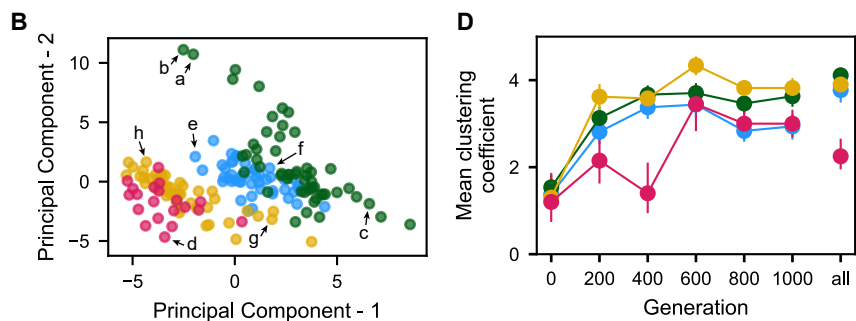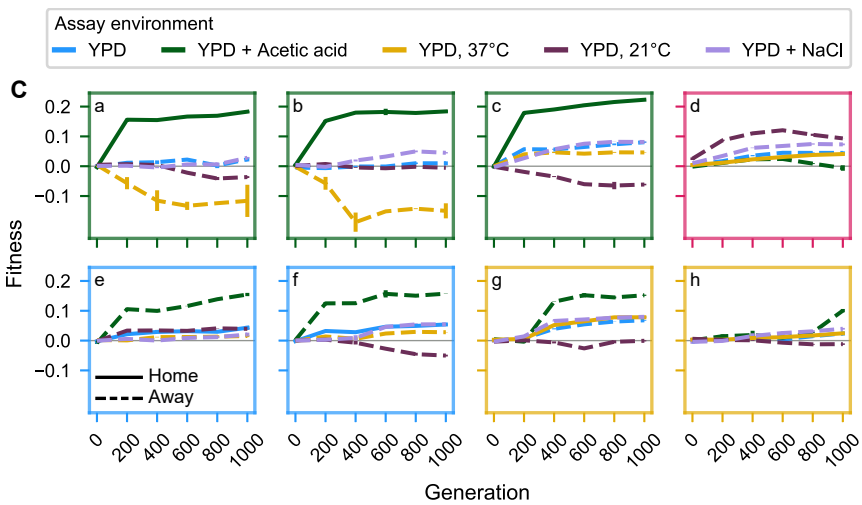

Supplement: supp [file elife-70918-supp-v1.zip]

**A**

Outliers excluded

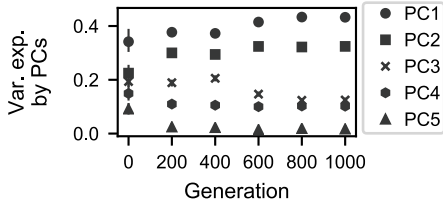**B**

Outliers included

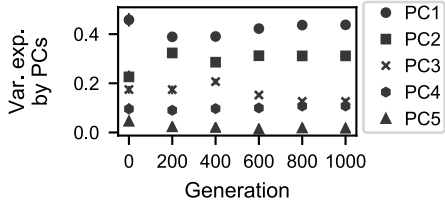

Supplement: supp [file elife-70918-supp-v1.zip]

**A**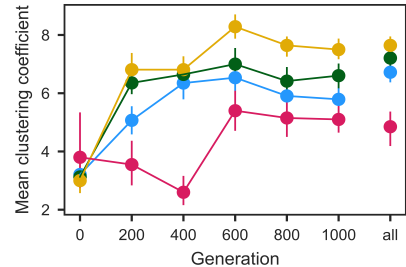**B**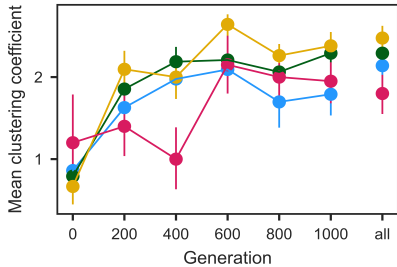

Supplement: supp [file elife-70918-supp-v1.zip]

**A**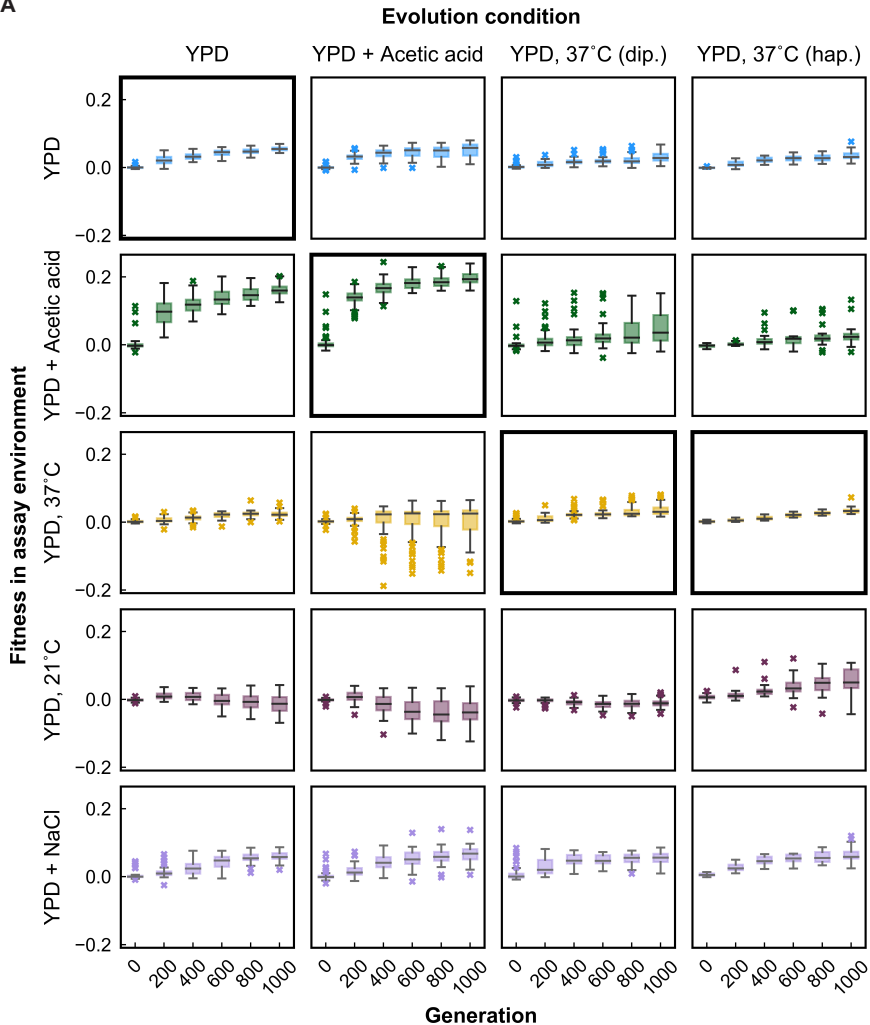**B**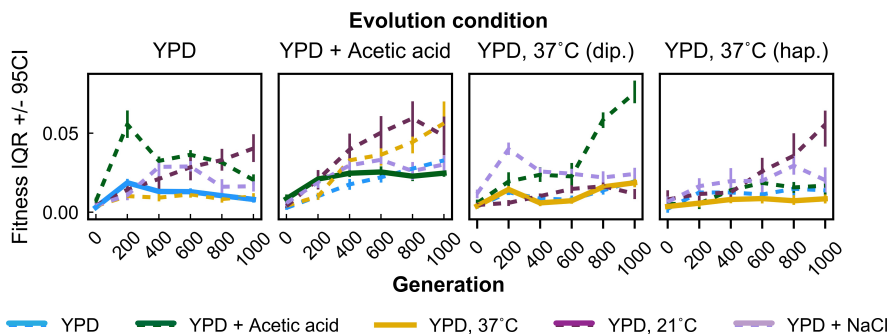

Supplement: supp [file elife-70918-supp-v1.zip]

**A**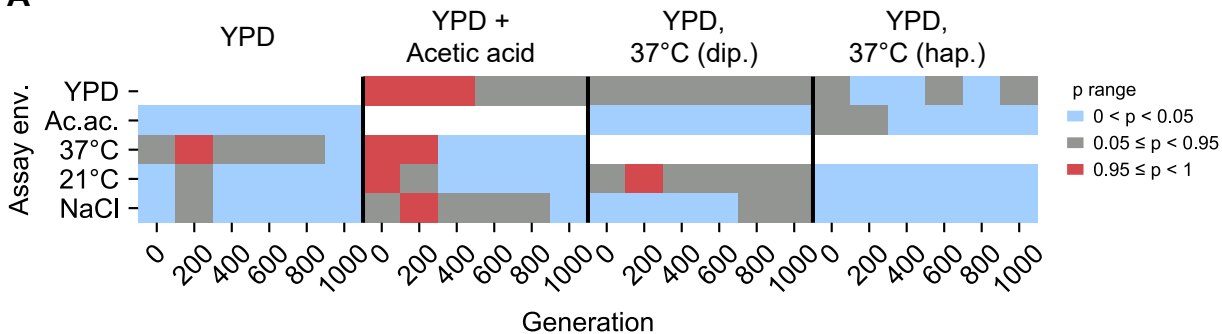**B**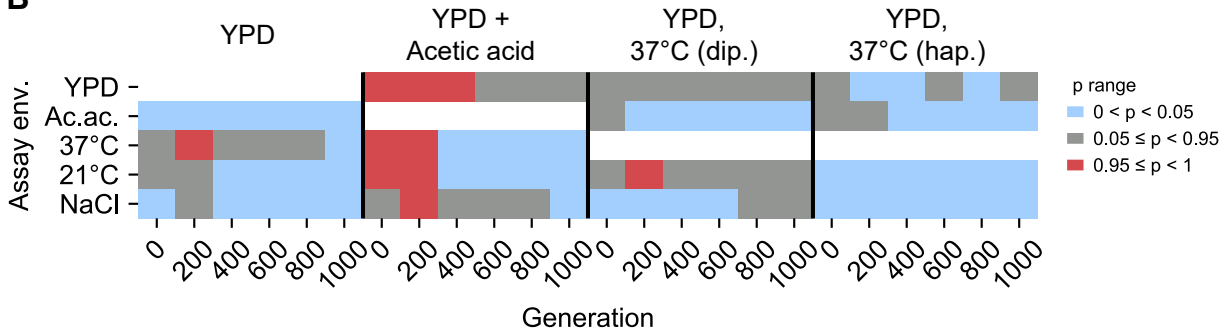

Supplement: supp [file elife-70918-supp-v1.zip]

**A**

Outliers excluded

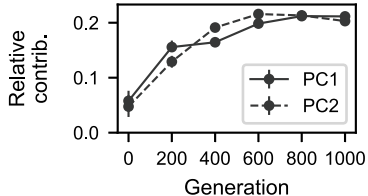**B**

Outliers included

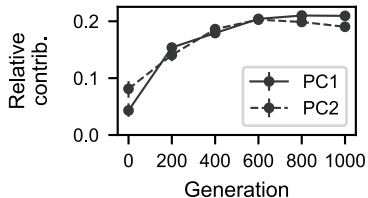

Supplement: supp [file elife-70918-supp-v1.zip]

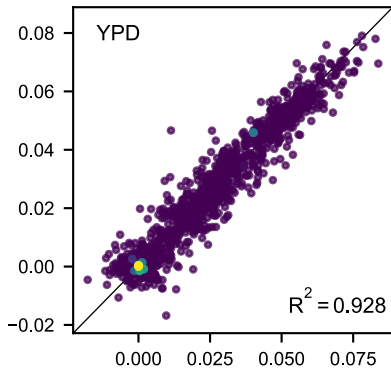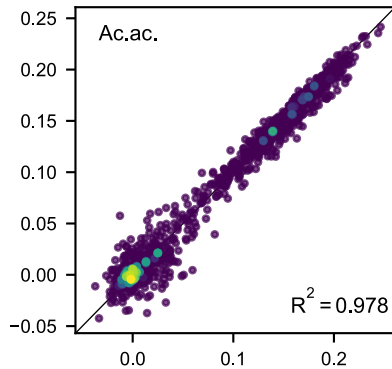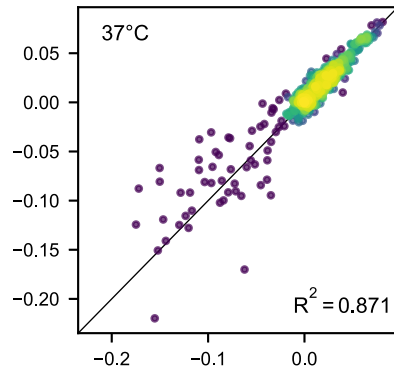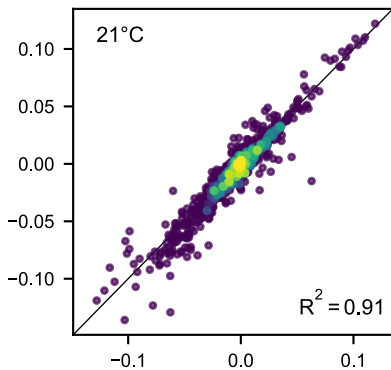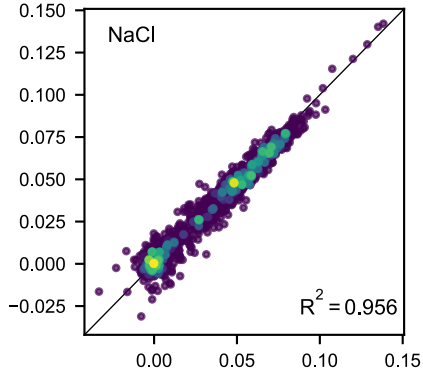

Low High  
Density

Supplement: supp [file elife-70918-supp-v1.zip]

**A**

## Haploid ancestor growth curves

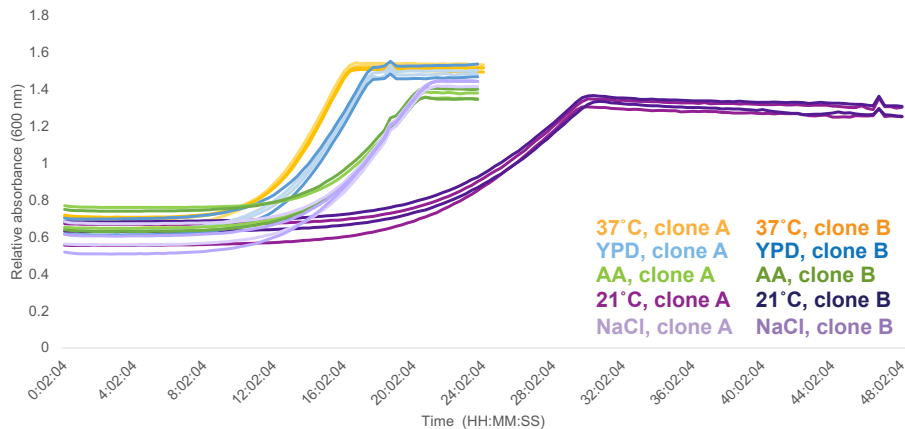**B**

## Diploid ancestor growth curves

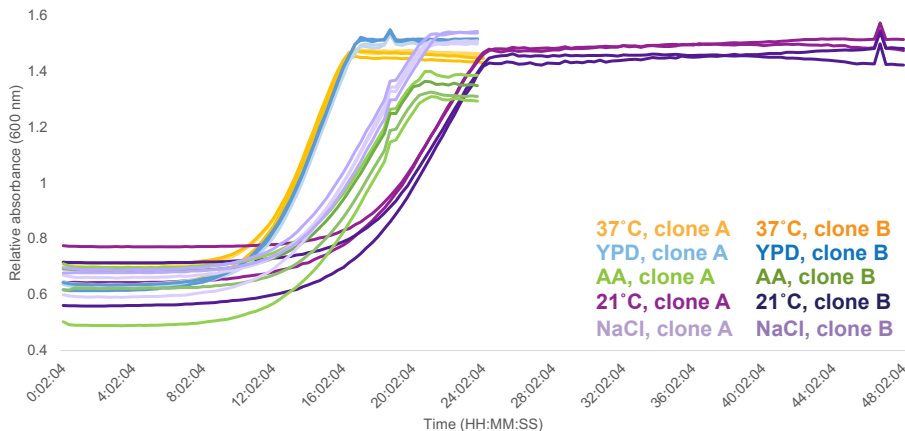

Supplement: supp [file elife-70918-supp-v1.zip]
